# Supplementary material for: Solid-state molecular oxygen activation using ball milling and a piezoelectric material for aerobic oxidation of thiols
Source: Royal Society of Chemistry journal article supplement (doi:10.1039/d2ra02255a), 2022-01-01
Supplement: d2ra02255a1.pdf [file d2ra02255a1.pdf]

## Supporting information

# **Solid-State Molecular Oxygen Activation Using Ball Milling and Piezoelectric Material for Aerobic Oxidation of Thiols**

Gefei Wang, Jiajia Jia, Yu He, Diandian Wei, Mingyu Song, Lei Zhang, Ganzhong Li, Heng Li, and  
Bingxin Yuan\*

Green Catalysis Center, College of Chemistry, Zhengzhou University, Zhengzhou, Henan, China  
450001.

E-mail: [bxyuan@zzu.edu.cn](mailto:bxyuan@zzu.edu.cn)

## Contents

|                                                                                          |           |
|------------------------------------------------------------------------------------------|-----------|
| <b>General Information</b> .....                                                         | <b>2</b>  |
| <b>Typical Procedure for the Cross-coupling reaction of all thiol</b> .....              | <b>2</b>  |
| <b>Procedure for the recycling of the piezoelectric catalyst BaTiO<sub>3</sub></b> ..... | <b>2</b>  |
| <b>Free radical trapping experiments</b> .....                                           | <b>2</b>  |
| <b>Gram-scale aerobic oxidative coupling of 1a</b> .....                                 | <b>3</b>  |
| <b>SEM and XRD analysis of the piezoelectric catalyst</b> .....                          | <b>4</b>  |
| <b>Characterization Data of all products</b> .....                                       | <b>6</b>  |
| <b>References</b> .....                                                                  | <b>12</b> |
| <b>The NMR Spectra of all products</b> .....                                             | <b>14</b> |

## General Information

All starting materials were purchased from commercial sources.  $^1\text{H}$  NMR and  $^{13}\text{C}$  NMR were recorded on a 400 MHz Bruker spectrometer (400 MHz for  $^1\text{H}$  NMR and 100 MHz for  $^{13}\text{C}$  NMR). Chemical shifts ( $\delta$ ) of  $^1\text{H}$  NMR and  $^{13}\text{C}$  NMR are reported in ppm relative to TMS and the residual solvent peak were converted to the TMS scale ( $\text{CDCl}_3$ :  $\delta\text{H} = 7.26$  ppm,  $\delta\text{C} = 77.16$  ppm,  $\text{H}_2\text{O}$ :  $\delta\text{H}$ : 7.26;  $\text{DMSO-d}_6$ :  $\delta\text{H} = 2.50$  ppm,  $\delta\text{C} = 39.52$  ppm,  $\text{H}_2\text{O}$ :  $\delta\text{H}$ : 3.33). The coupling constants ( $J$ ) are in Hertz (Hz). The used abbreviations are as follows: s (singlet), d (doublet), t (triplet), q (quartet), dd (doublet of doublets), ddd (doublet of doublet of doublets), dt (doublet of triplets), td (triplet of doublets), tt (triplet of triplets), qd (a quartet of doublets), m (multiplet). The high-resolution mass spectra (HRMS) data were measured on a UHPLC Q-TOF HR-MS using the ESI technique, with accurate masses reported for the molecular ion ( $[\text{M}]^+$ ). The low-resolution mass spectra (LRMS) data were measured on the SHIMADZU GCMS-QP 2010 SE mass spectrometer (Kyoto, Japan) by means of the EI technique. The melting points of these compounds were determined by an X-4A micro-melting point apparatus (Shanghai, China). All chemical reactions were carried out in an MSK-SFM-12M-22V ball mill (produced by HE FEI KE JING materials technology company) The reaction was monitored by thin-layer chromatography (TLC) and GCMS. Gram-scale aerobic oxidative coupling of **1a** was conducted in an AM100S mixer mill (Ants Scientific Instruments). GCMS basic information: The temperature of oven:  $70^\circ\text{C}$ , Inlet temperature:  $310^\circ\text{C}$ , Ion source temperature:  $200^\circ\text{C}$ , Interface temperature:  $250^\circ\text{C}$ , Sample way: Shunt, Injector pressure:  $100\text{ kPa}$ . All SEM images were taken using a Zeiss Sigma 500 SEM. X-ray diffraction (XRD) patterns were obtained using an X-ray diffractometer (PANalytical, X'Pert PRO).

## Typical Procedure for the Cross-coupling reaction of all thiols

A 2 mL PE milling jar equipped with five 4 mm stainless steel balls was charged with **1** (0.2 mmol) and  $\text{BaTiO}_3$  ( $< 3\ \mu\text{m}$ ) (450 mg, 1.93 mmol). After closing the jar tightly, the mechanochemical reaction was carried out for 6 mins at 3800 rpm. After the reaction was completed, the powdery mixture was washed out with dichloromethane, centrifuged and concentrated under reduced pressure to get the pure product (**2a-s**, **2w-z**). In the case of compounds **2t-v**, the concentrated filtrate was further purified by silica gel chromatography.

## Procedure for the recycling of the piezoelectric catalyst $\text{BaTiO}_3$

A 2 mL PE steel milling jar equipped with 5 stainless steel balls of 4 mm in diameter was charged with 4-methoxybenzenethiol **1a** (0.2 mmol, 1.0 equiv.), and  $\text{BaTiO}_3$  ( $< 3\ \mu\text{m}$ ) (450 mg, 1.93 mmol). The mechanochemical reaction was carried out for 6 min at 3800 rpm. After the reaction completed, the reaction mixture was washed with dichloromethane and filtered. The filtrate was concentrated under reduced pressure to get the pure product. The  $\text{BaTiO}_3$  was collected and dried in the oven at  $80^\circ\text{C}$  for 1 h. The recycled  $\text{BaTiO}_3$  was used for the next run by adding a fresh batch of **1a** under the same reaction condition. The  $\text{BaTiO}_3$  was used for the 30 runs. The product yields of 30 runs are as following:  $>99\%$ ,  $>99\%$ ,  $>99\%$ ,  $>99\%$ ,  $>99\%$ ,  $>99\%$ ,  $>99\%$ ,  $>99\%$ ,  $>99\%$ ,  $>99\%$ ,  $>99\%$ ,  $>99\%$ ,  $>99\%$ ,  $>99\%$ ,  $>99\%$ ,  $>99\%$ ,  $>99\%$ ,  $>99\%$ ,  $>99\%$ ,  $>99\%$ ,  $>99\%$ ,  $>99\%$ ,  $>99\%$ ,  $>99\%$ ,  $>99\%$ ,  $>99\%$ ,  $>99\%$ ,  $>99\%$ ,  $>99\%$ ,  $>99\%$ ,  $>99\%$ ,  $>99\%$ ,  $>99\%$ ,  $97\%$ ,  $93\%$ ,  $90\%$ ,  $82\%$ ,  $73\%$ ,  $65\%$ ,  $60\%$ ,  $56\%$ ,  $50\%$ .

## Free radical trapping experiments

### 1. Free radical trapping of **1a** with TEMPO

To a 2 mL PE milling jar was added **1a** (0.2 mmol),  $\text{BaTiO}_3$  (450 mg, 1.93 mmol), TEMPO (62.4

mg, 0.4 mmol). The reaction was carried out at 3800 rpm for 6 min. The reaction mixture was extracted with dichloromethane (2 mL), and analyzed by HRMS analysis. HRMS (ESI)  $m/z$  calcd for  $C_{16}H_{25}NO_2S$  ( $[M]^+$ ): 295.1601; found, 295.1550. The HRMS result suggested that a thiyl radical might be involved in this transformation.

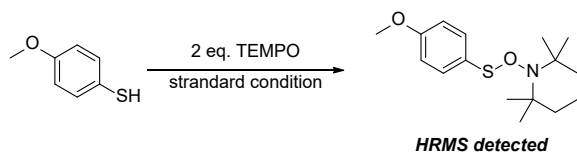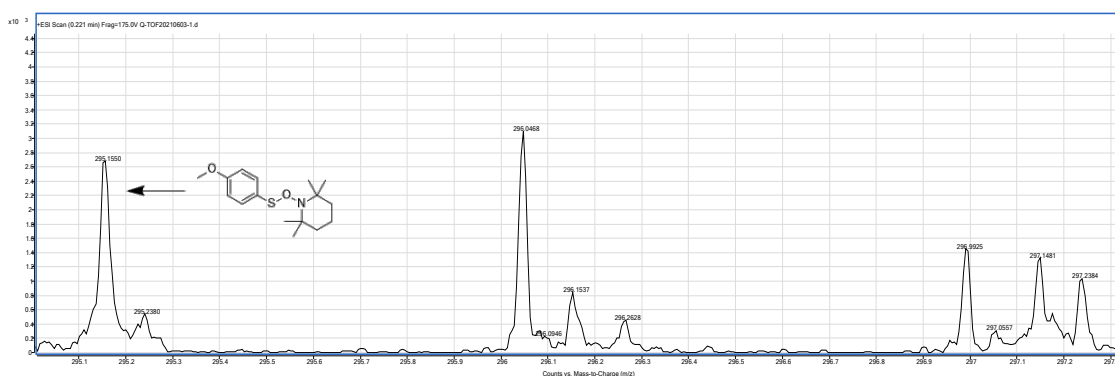

## 2. Free radical trapping of **1a** with DMPO

To a 2 mL PE milling jar was added **1a** (0.2 mmol),  $BaTiO_3$  (450 mg, 1.93 mmol), DMPO (45.2mg, 0.4 mmol). The reaction was carried out at 3800 rpm for 6 min. The reaction mixture was extracted with dichloromethane (2 mL) and analyzed by HRMS analysis. HRMS (ESI)  $m/z$  calcd for  $C_{13}H_{18}NO_2S$  ( $[M]^+$ ): 254.1209; found, 254.1206. The HRMS result suggested that a thiyl radical might be involved in this transformation.

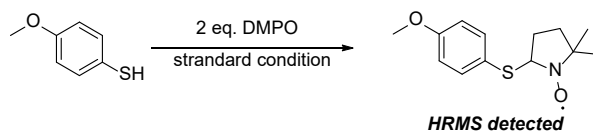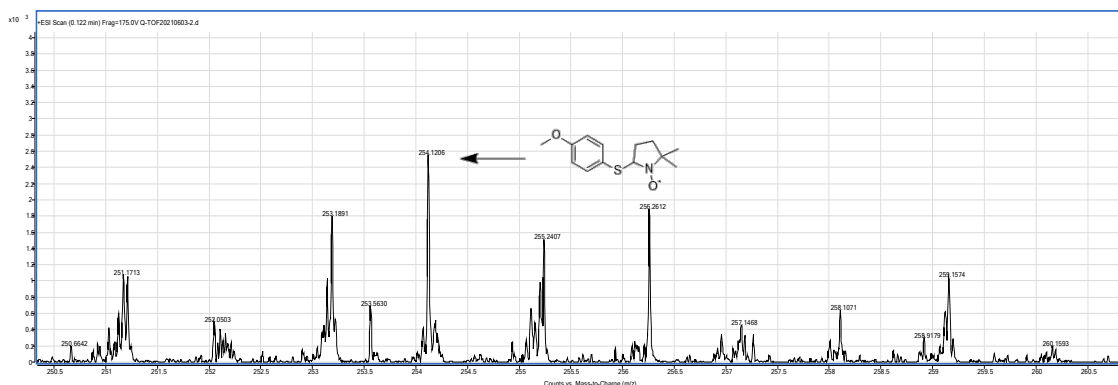

## Gram-scale aerobic oxidative coupling of **1a**

A 10 mL PE steel milling jar equipped with five 5 mm stainless steel balls, 4-methoxybenzenethiol **1a** (3 mmol), and  $BaTiO_3$  ( $< 3 \mu m$ ) (6.6 g, 28.5 mmol). After closing the jar tightly, the mechanochemical reaction was carried out for 20 mins at 2100 rpm. During the reaction, we opened the mill jar every five minutes to ensure there was enough molecular oxygen for the reaction. After the reaction was completed, the reaction mixture was washed with dichloromethane ( $10 \times 5$  mL) and filtered. The filtrate was

concentrated under reduced pressure to get the product.

### SEM analysis of the piezoelectric catalyst

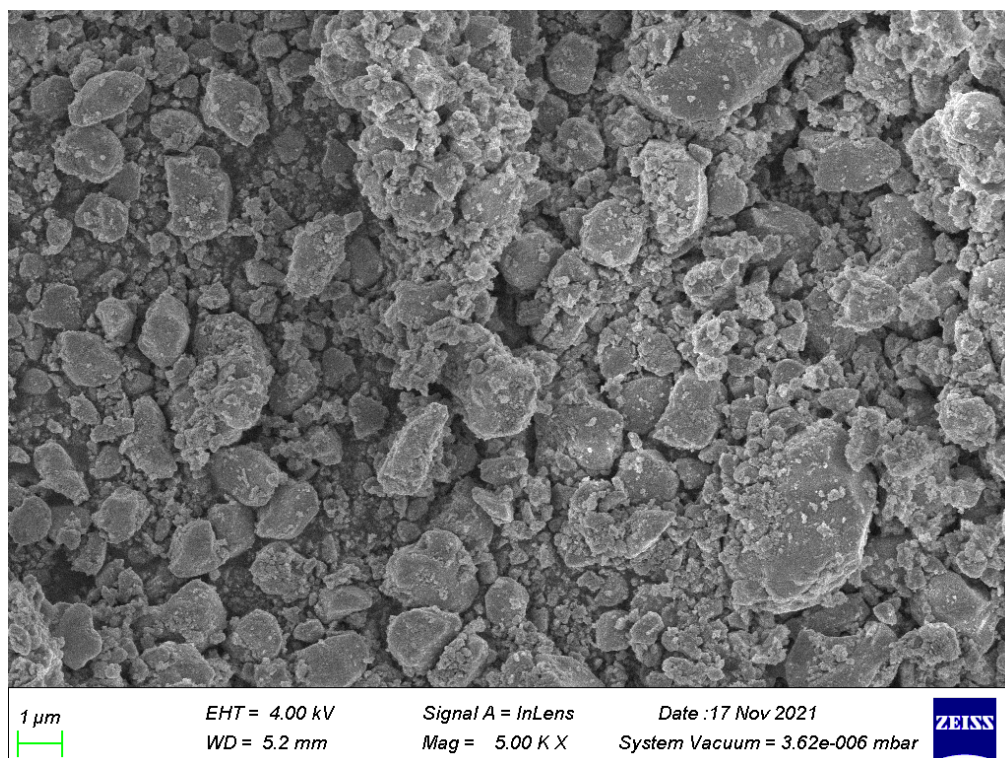

Figure S1. SEM image of commercially available  $\text{BaTiO}_3$  (< 3  $\mu\text{m}$ ) before use.

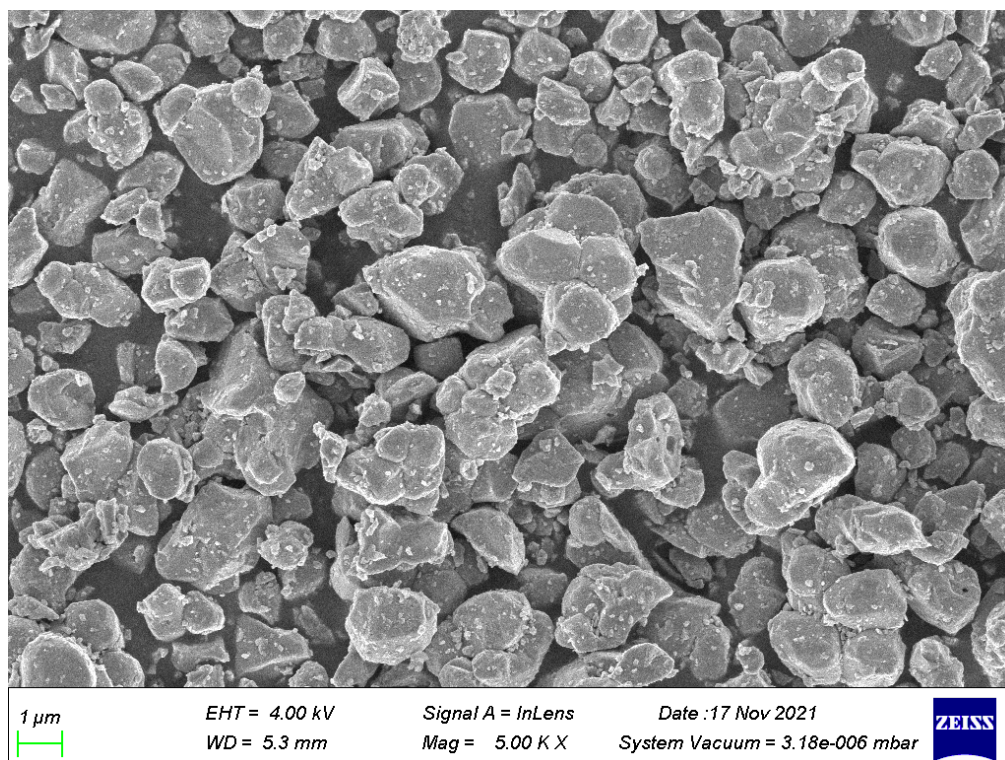

Figure S2. SEM image of  $\text{BaTiO}_3$  (< 3  $\mu\text{m}$ ) under ball milling for aerobic oxidative coupling of **1a** recovered from the 15<sup>th</sup> cycle.

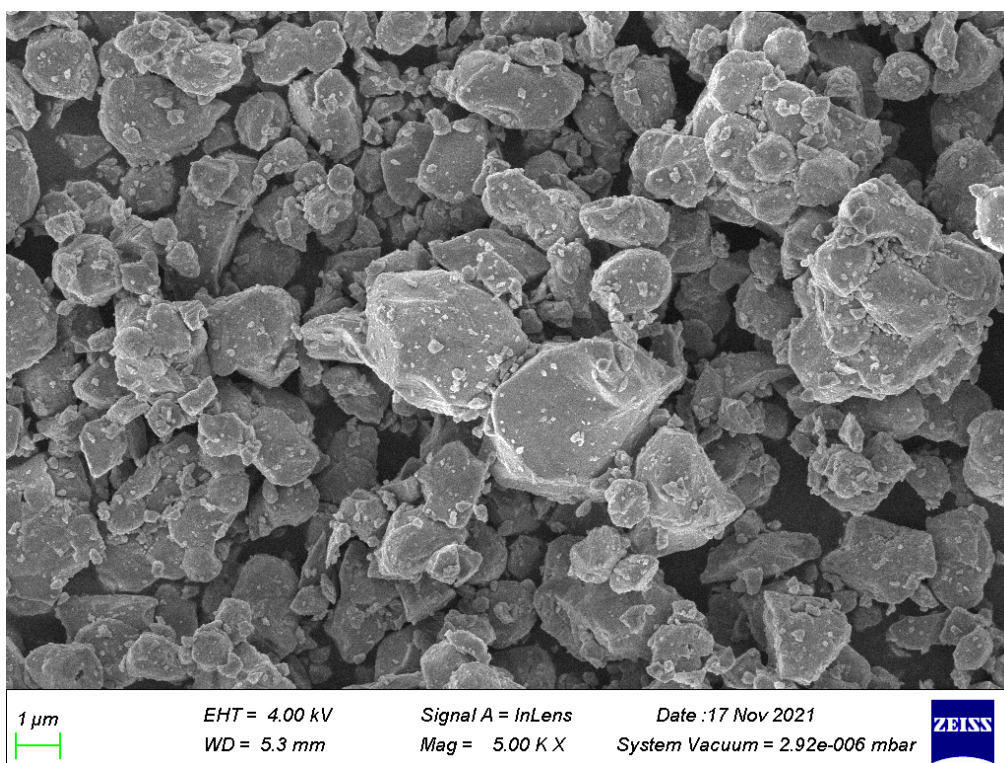

Figure S3. SEM image of BaTiO<sub>3</sub> (< 3  $\mu\text{m}$ ) under ball milling for aerobic oxidative coupling of **1a** recovered from the 24<sup>th</sup> cycle.

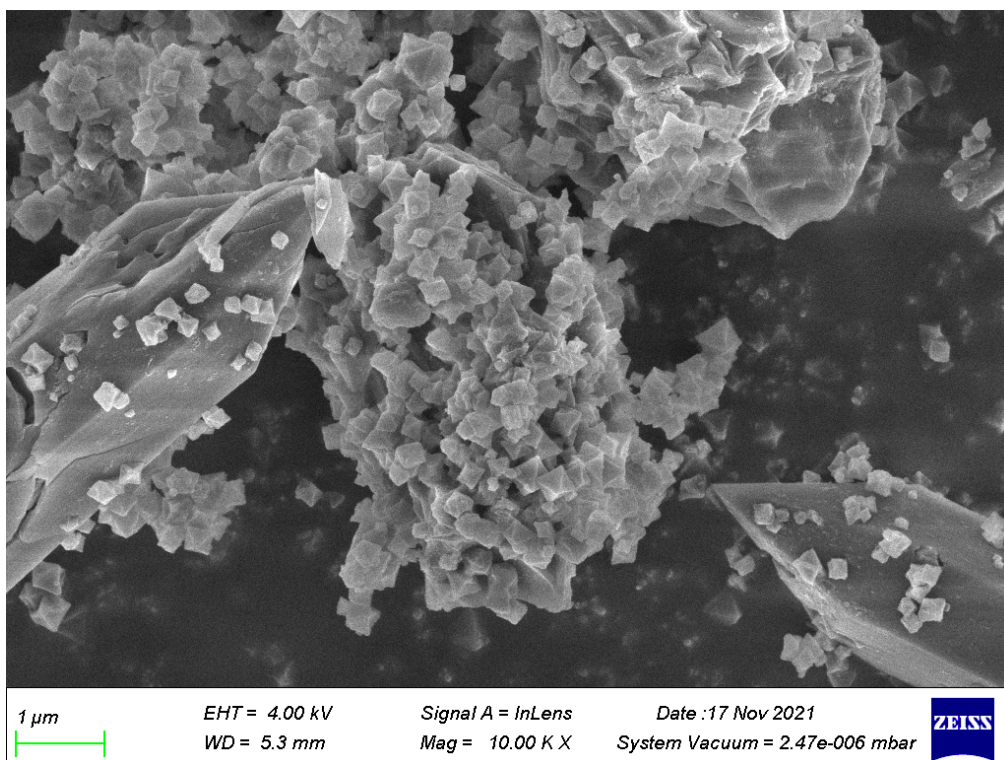

Figure S4. SEM image of BaTiO<sub>3</sub> (< 3  $\mu\text{m}$ ) under ball milling for aerobic oxidative coupling of **1a** recovered from the 30<sup>th</sup> cycle.

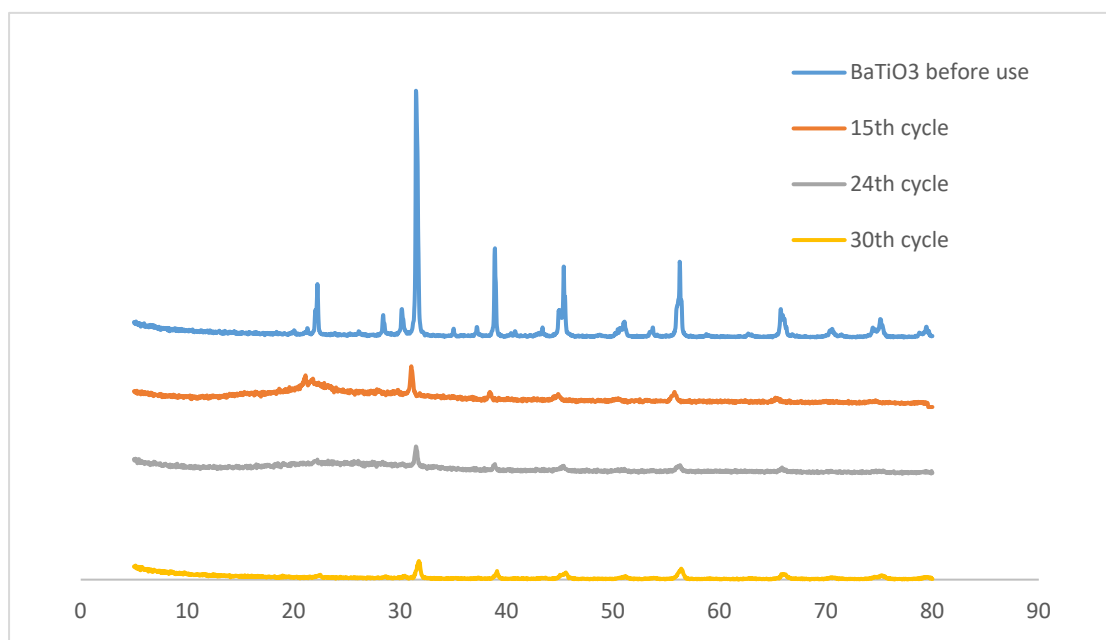

Figure S5. XRD analysis of BaTiO<sub>3</sub> (< 3 um) under ball milling for aerobic oxidative coupling of **1a** before use, recovered from the 15<sup>th</sup> cycle, the 24<sup>th</sup> cycle, and the 30<sup>th</sup> cycle.

#### Characterization Data of all products

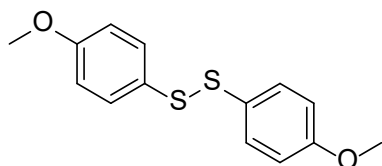

**1,2-bis(4-methoxyphenyl)disulfane (2a)**<sup>1</sup> Yellow oil (27.8 mg, > 99%), (hexane as TLC eluent). <sup>1</sup>H NMR (400 MHz, CDCl<sub>3</sub>) δ 7.39 (s, 4H), 6.83 (d, *J* = 8.9 Hz, 4H), 3.80 (s, 6H). <sup>13</sup>C NMR (100 MHz, CDCl<sub>3</sub>) δ 159.93, 132.67, 128.46, 114.63, 55.38. LRMS (EI): *m/z* calcd for C<sub>14</sub>H<sub>14</sub>O<sub>2</sub>S<sub>2</sub>([M]<sup>+</sup>): 278.31; found 277.90.

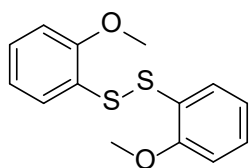

**1,2-bis(2-methoxyphenyl)disulfane (2b)**<sup>1</sup> White solid (27.8 mg, >99%), (hexane as TLC eluent). mp: 115-116 °C. <sup>1</sup>H NMR (400 MHz, CDCl<sub>3</sub>) δ 7.53 (dd, *J* = 7.8, 1.6 Hz, 2H), 7.18 (ddd, *J* = 8.1, 7.4, 1.6 Hz, 2H), 6.91 (td, *J* = 7.6, 1.2 Hz, 2H), 6.85 (dd, *J* = 8.2, 1.2 Hz, 2H), 3.90 (s, 6H). <sup>13</sup>C NMR (100 MHz, CDCl<sub>3</sub>) δ 156.62, 127.76, 127.63, 124.63, 121.36, 110.52, 55.91. LRMS (EI): *m/z* calcd for C<sub>14</sub>H<sub>14</sub>O<sub>2</sub>S<sub>2</sub>([M]<sup>+</sup>): 278.04; found 278.15.

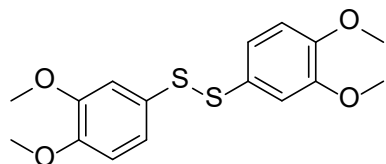

**1,2-bis(3,4-dimethoxyphenyl)disulfane (2c)**<sup>2</sup> Light yellow solid (33.8 mg, >99%), (hexane as TLC eluent). mp: 79–80 °C. <sup>1</sup>H NMR (400 MHz, CDCl<sub>3</sub>) δ 7.09–6.98 (m, 4H), 6.79 (d, *J* = 8.3 Hz, 2H), 3.87 (s, 6H), 3.83 (s, 6H). <sup>13</sup>C NMR (100 MHz, CDCl<sub>3</sub>) δ 149.5, 149.1, 128.7, 123.9, 114.1, 111.3, 55.9 (d, *J* = 5.9 Hz). LRMS (EI) *m/z* calcd for C<sub>16</sub>H<sub>18</sub>O<sub>4</sub>S<sub>2</sub> ([M]<sup>+</sup>): 338.06, found 338.10.

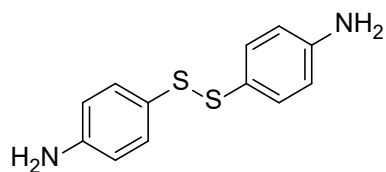

**4,4'-disulfanediyldianiline (2d)**<sup>1,3</sup> Yellow solid (24.8 mg, >99%), (hexane as TLC eluent). mp: 74–75 °C. <sup>1</sup>H NMR (400 MHz, CDCl<sub>3</sub>) δ 7.26 (dd, *J* = 6.3, 2.2 Hz, 4H), 6.59 (d, *J* = 8.5 Hz, 4H), 3.78 (s, 4H). <sup>13</sup>C NMR (100 MHz, CDCl<sub>3</sub>) δ 147.0, 133.9, 125.8, 115.3. LRMS (EI) *m/z* calcd for C<sub>12</sub>H<sub>12</sub>N<sub>2</sub>S<sub>2</sub> ([M]<sup>+</sup>): 248.04, found 247.85.

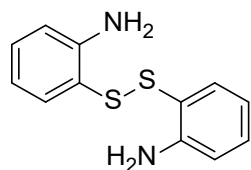

**2,2'-disulfanediyldianiline (2e)**<sup>3</sup> Yellow solid (24.8 mg, >99%), (hexane as TLC eluent). mp: 90–91 °C; <sup>1</sup>H NMR (400 MHz, CDCl<sub>3</sub>) δ 7.22–7.09 (m, 4H), 6.71 (dd, *J* = 8.4, 1.3 Hz, 2H), 6.58 (td, *J* = 7.5, 1.3 Hz, 2H), 4.32 (s, 4H). <sup>13</sup>C NMR (100 MHz, CDCl<sub>3</sub>) δ 148.6, 136.8, 131.6, 118.7, 118.2, 115.2. LRMS (EI) calcd for C<sub>12</sub>H<sub>12</sub>N<sub>2</sub>S<sub>2</sub> ([M]<sup>+</sup>): 248.04, found 247.95.

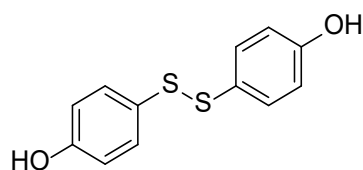

**4,4'-disulfanediyldiphenol (2f)**<sup>4</sup> White solid (25mg, >99%), (hexane as TLC eluent). mp: 144–146 °C. <sup>1</sup>H NMR (400 MHz, DMSO-*d*<sub>6</sub>) δ 9.83 (s, 2H), 7.27 (d, *J* = 8.6 Hz, 4H), 6.76 (d, *J* = 8.7 Hz, 4H). <sup>13</sup>C NMR (100 MHz, DMSO-*d*<sub>6</sub>) δ 158.3, 133.0, 125.1, 116.3. LRMS (EI) *m/z* calcd for C<sub>12</sub>H<sub>10</sub>O<sub>2</sub>S<sub>2</sub> ([M]<sup>+</sup>): 250.01, found 250.34.



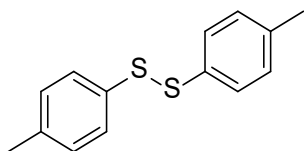

**1,2-di-p-tolyldisulfane (2g)**<sup>5</sup> Colorless solid (24.6 mg, >99%), (hexane as TLC eluent). mp: 44-46 °C. <sup>1</sup>H NMR (400 MHz, CDCl<sub>3</sub>) δ 7.30 (d, *J* = 8.2 Hz, 4H), 7.07–6.92 (m, 4H), 2.24 (s, 6H). <sup>13</sup>C NMR (100 MHz, CDCl<sub>3</sub>) δ 137.4, 133.9, 129.8, 128.5, 21.1. LRMS (EI) *m/z* calcd for C<sub>14</sub>H<sub>14</sub>S<sub>2</sub> ([M]<sup>+</sup>): 246.05, found 246.15.

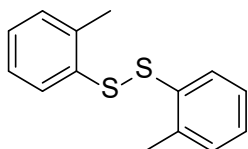

**1,2-di-o-tolyldisulfane (2h)**<sup>3</sup> White solid (24.6 mg, >99%), (hexane as TLC eluent). mp: 38-39 °C. <sup>1</sup>H NMR (400 MHz, CDCl<sub>3</sub>) δ 7.57–7.45 (m, 2H), 7.20–7.08 (m, 6H), 2.43 (s, 6H). <sup>13</sup>C NMR (100 MHz, CDCl<sub>3</sub>) δ 137.3, 135.4, 130.3, 128.5, 127.3, 126.7, 20.0. LRMS (EI) *m/z* calcd for C<sub>14</sub>H<sub>14</sub>S<sub>2</sub> ([M]<sup>+</sup>): 246.05, found 246.05.

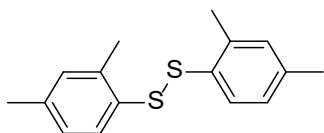

**1,2-bis(2,4-dimethylphenyl)disulfane (2i)**<sup>6, 7</sup> Yellow oil (27.4 mg, >99%). (hexane as TLC eluent). <sup>1</sup>H NMR (400 MHz, CDCl<sub>3</sub>) δ 7.37 (d, *J* = 7.9 Hz, 2H), 7.04–6.98 (m, 2H), 6.93 (dd, *J* = 7.9, 2.0 Hz, 2H), 2.37 (s, 6H), 2.29 (s, 6H). <sup>13</sup>C NMR (100 MHz, CDCl<sub>3</sub>) δ 138.3, 137.8, 132.3, 131.2, 130.5, 127.3, 20.9, 20.2. LRMS (EI): *m/z* calcd for C<sub>16</sub>H<sub>18</sub>S<sub>2</sub> ([M]<sup>+</sup>): 274.08, found 274.10.

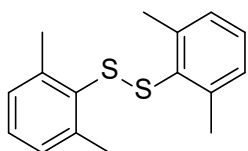

**1,2-bis(2,6-dimethylphenyl)disulfane (2j)**<sup>8</sup> Colorless oil (27.4 mg, >99%), (hexane as TLC eluent). <sup>1</sup>H NMR (400 MHz, CDCl<sub>3</sub>) δ 7.10 (dd, *J* = 8.2, 6.8 Hz, 2H), 7.01 (d, *J* = 7.2 Hz, 4H), 2.23 (s, 12H). <sup>13</sup>C NMR (100 MHz, CDCl<sub>3</sub>) δ 143.5, 134.8, 129.4, 128.1, 21.5. LRMS (EI) *m/z* calcd for C<sub>16</sub>H<sub>18</sub>S<sub>2</sub> ([M]<sup>+</sup>): 274.08, found 274.20.

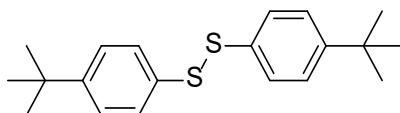

**1,2-bis(4-tert-butylphenyl)disulfane (2k)**<sup>9</sup> White solid (33 mg, >99%), (hexane as TLC eluent). mp: 70–72 °C. <sup>1</sup>H NMR (400 MHz, CDCl<sub>3</sub>) δ 7.52–7.40 (m, 4H), 7.37–7.28 (m, 4H), 1.29 (s, 18H). <sup>13</sup>C NMR (100 MHz, CDCl<sub>3</sub>) δ 150.5, 134.0, 127.7, 126.1, 34.5, 31.3. LRMS (EI) *m/z* calcd for C<sub>20</sub>H<sub>26</sub>S<sub>2</sub> ([M]<sup>+</sup>): 330.15, found 330.25.

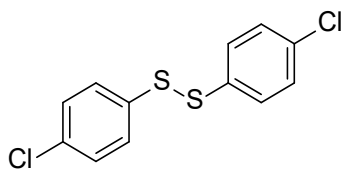

**1,2-bis(4-chlorophenyl)disulfane (2l)**<sup>5</sup> White solid, (28.5 mg, >99%), (hexane as TLC eluent). mp: 60-63 °C. <sup>1</sup>H NMR (400 MHz, CDCl<sub>3</sub>) δ 7.51–7.42 (m, 4H), 7.37–7.29 (m, 4H). <sup>13</sup>C NMR (100 MHz, CDCl<sub>3</sub>) δ 135.15, 133.67, 129.36, 129.32. LRMS (EI): m/z calcd for C<sub>12</sub>H<sub>8</sub>S<sub>2</sub>Cl<sub>2</sub> ([M]<sup>+</sup>): 285.94, found 286.05.

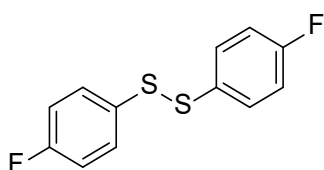

**1,2-bis(4-fluorophenyl)disulfane(2m)**<sup>12</sup> Colorless oil (25.4 mg, >99%). (hexane as TLC eluent). <sup>1</sup>H NMR (400 MHz, CDCl<sub>3</sub>) δ 7.55 (dd, J = 10.4, 6.8 Hz, 4H), 7.23 (t, J = 10.5 Hz, 4H). <sup>13</sup>C NMR (100 MHz, CDCl<sub>3</sub>) δ 161.40, 132.17, 131.35, 116.40. LRMS (EI) m/z calcd for C<sub>12</sub>H<sub>8</sub>F<sub>2</sub>S<sub>2</sub> ([M]<sup>+</sup>): 254.00, found 253.90.

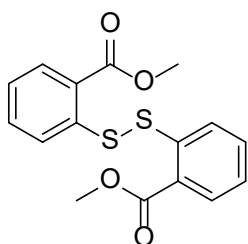

**dimethyl 2,2'-disulfanediyl dibenzoate(2n)**<sup>13</sup> White solid (22.7 mg, 68% yield), (hexane : dichloromethane = 5:1 as eluent). mp:126-128 °C. <sup>1</sup>H NMR (400 MHz, DMSO-d<sub>6</sub>) δ 8.05 (dd, J = 7.8, 1.4 Hz, 2H), 7.69 – 7.54 (m, 4H), 7.38 (m, 2H), 3.93 (s, 6H). <sup>13</sup>C NMR (100 MHz, DMSO-d<sub>6</sub>) δ 166.0, 138.6, 133.7, 131.4, 126.9, 126.3, 125.2, 52.5. LRMS (EI) m/z calcd for C<sub>16</sub>H<sub>14</sub>O<sub>4</sub>S<sub>2</sub> ([M]<sup>+</sup>): 334.03, found 334.10.

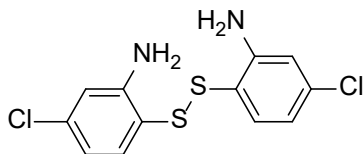

**6,6'-disulfanediylbis(3-chloroaniline)(2o)**<sup>14</sup> Yellow solid (31.7 mg, >99%), (hexane as TLC eluent). mp: 76-78 °C. <sup>1</sup>H NMR (400 MHz, CDCl<sub>3</sub>) δ 7.03 (d, J = 8.2 Hz, 2H), 6.71 (d, J = 2.2 Hz, 2H), 6.56 (dd, J = 8.2, 2.2 Hz, 2H), 4.41 (s, 4H). <sup>13</sup>C NMR (100 MHz, CDCl<sub>3</sub>) δ 149.4, 137.8, 118.3, 116.6, 114.7. LRMS (EI) calcd for C<sub>12</sub>H<sub>12</sub>Cl<sub>2</sub>N<sub>2</sub>S<sub>2</sub> ([M+2H]<sup>+</sup>): 317.97, found 318.10.

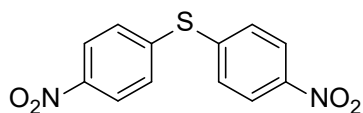

**bis(4-nitrophenyl)sulfane(2p)**<sup>10, 11</sup> White solid (21.5 mg, 78%), (hexane as eluent). mp: 161-163 °C. <sup>1</sup>H NMR (400 MHz, CDCl<sub>3</sub>) δ 8.20 (d, *J* = 8.9 Hz, 4H), 7.62 (d, *J* = 8.9 Hz, 4H). <sup>13</sup>C NMR (100 MHz, CDCl<sub>3</sub>) δ 147.0, 144.0, 126.4, 124.4. LRMS (EI) *m/z* calcd for C<sub>12</sub>H<sub>8</sub>N<sub>2</sub>O<sub>4</sub>S([M]<sup>+</sup>): 276.02, found 276.10.

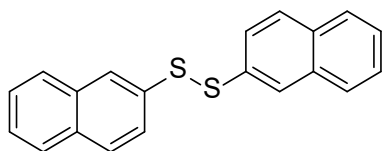

**1,2-di(naphthalen-2-yl)disulfane(2q)**<sup>15</sup> Pale yellow solid (31.8 mg, >99%), (hexane as TLC eluent). mp: 141-142 °C. <sup>1</sup>H NMR (400 MHz, CDCl<sub>3</sub>) δ 7.98 (d, *J* = 1.9 Hz, 2H), 7.79 (dd, *J* = 9.0, 2.8 Hz, 4H), 7.76-7.70 (m, 2H), 7.62 (dd, *J* = 8.7, 1.9 Hz, 2H), 7.52-7.35 (m, 4H). <sup>13</sup>C NMR (100 MHz, CDCl<sub>3</sub>) δ 134.3, 133.5, 132.5, 129.0, 127.7, 127.4, 126.7, 126.6, 126.2, 125.7. LRMS (EI) *m/z* calcd for C<sub>20</sub>H<sub>14</sub>S<sub>2</sub>([M]<sup>+</sup>): 318.05, found 318.46.

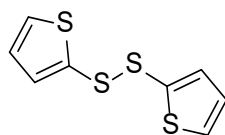

**1,2-di(thiophen-2-yl)disulfane (2r)**<sup>16</sup> Yellow oil (22.9 mg, >99%). (hexane as TLC eluent). <sup>1</sup>H NMR (400 MHz, CDCl<sub>3</sub>) δ 7.51 (s, 2H), 7.16 (dd, *J* = 3.6, 1.3 Hz, 2H), 7.02 (dd, *J* = 5.3, 3.6 Hz, 2H). <sup>13</sup>C NMR (100 MHz, CDCl<sub>3</sub>) δ 135.75, 135.67, 132.30, 127.78. LRMS (EI) *m/z* calcd for C<sub>8</sub>H<sub>6</sub>S<sub>4</sub> ([M]<sup>+</sup>): 230.94, found 230.00.

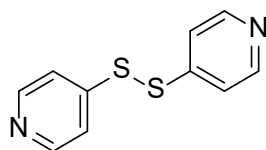

**1,2-di(pyridin-4-yl)disulfane (2s)**<sup>3, 17</sup> Yellow oil (39 % yield). (hexane : ethyl acetate =3:1 as eluent) <sup>1</sup>H NMR (400 MHz, CDCl<sub>3</sub>) δ 8.56-8.53 (m, 4H), 7.26-7.23 (m, 4H). <sup>13</sup>C NMR (100 MHz, CDCl<sub>3</sub>) δ 149.9, 144.0, 124.8. LRMS (EI) *m/z* calcd for C<sub>10</sub>H<sub>8</sub>N<sub>2</sub>S<sub>2</sub> ([M]<sup>+</sup>): 220.01, found 219.95.

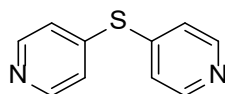

**di(pyridin-4-yl)sulfane(2s')** Yellow oil (61% yield). (hexane : ethyl acetate =3:1 as eluent). <sup>1</sup>H NMR (400 MHz, CDCl<sub>3</sub>) δ 8.51-8.47 (m, 4H), 7.39-7.34 (m, 4H). <sup>13</sup>C NMR (100 MHz, CDCl<sub>3</sub>) δ 149.9, 146.5, 120.1. LRMS (EI) *m/z* calcd for C<sub>10</sub>H<sub>8</sub>N<sub>2</sub>S ([M]<sup>+</sup>): 188.04, found 188.10.

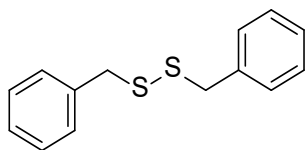

**1,2-dibenzyl disulfane(2t)**<sup>3</sup> Yellow oil (17.2 mg, 70% yield), (hexane : dichloromethane = 5:1 as eluent). <sup>1</sup>H NMR (400 MHz, CDCl<sub>3</sub>) δ 7.38–7.16 (m, 10H), 3.60 (s, 4H). <sup>13</sup>C NMR (100 MHz, CDCl<sub>3</sub>) δ 137.3, 129.4, 128.5, 127.4, 43.3. LRMS (EI) m/z calcd for C<sub>14</sub>H<sub>14</sub>S<sub>2</sub> ([M]<sup>+</sup>): 246.05, found 246.05.

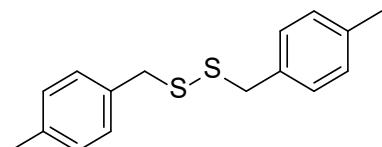

**1,2-bis(4-methylbenzyl) disulfane(2u)**<sup>18</sup> Colorless solid, isolated yield (17mg, 70% yield), (hexane : dichloromethane = 5:1 as eluent). <sup>1</sup>H NMR (400 MHz, CDCl<sub>3</sub>) δ 7.14 (s, 8H), 3.61 (s, 4H), 2.34 (s, 6H). <sup>13</sup>C NMR (100 MHz, CDCl<sub>3</sub>) δ 137.1, 134.2, 129.2, 43.0, 21.1. LRMS (EI) m/z calcd for C<sub>16</sub>H<sub>18</sub>S<sub>2</sub> ([M]<sup>+</sup>): 274.08, found 273.95.

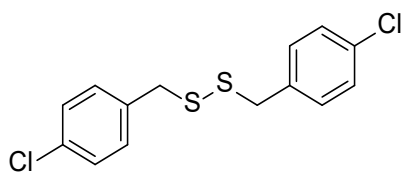

**Bis(4-chlorobenzyl) disulfide(2v)**<sup>7</sup> white solid, isolated yield (22.2 mg, 71% yield), (hexane : dichloromethane = 5:1 as eluent). mp: 62-63 °C. <sup>1</sup>H NMR (400 MHz, CDCl<sub>3</sub>) δ 7.30–7.28 (m, 4H), 7.16–7.14 (m, 4H), 3.57 (s, 4H). <sup>13</sup>C NMR (100 MHz, CDCl<sub>3</sub>) δ 135.8, 133.4, 130.6, 128.7, 42.5. LRMS (EI) calcd for C<sub>14</sub>H<sub>12</sub>S<sub>2</sub>Cl<sub>2</sub> ([M]<sup>+</sup>): 313.98, found 314.00.

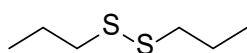

**1,2-dipropyl disulfane(2w)**<sup>18</sup> Colorless oil (15 mg, >99%). (hexane as TLC eluent). <sup>1</sup>H NMR (400 MHz, CDCl<sub>3</sub>) δ 2.67 (dd, J = 7.7, 6.8 Hz, 4H), 1.71 (h, J = 7.3 Hz, 4H), 1.00 (t, J = 7.3 Hz, 6H). <sup>13</sup>C NMR (100 MHz, CDCl<sub>3</sub>) δ 41.2, 22.5, 13.1. LRMS (EI) calcd for C<sub>6</sub>H<sub>14</sub>S<sub>2</sub> ([M]<sup>+</sup>): 150.05, found 150.05.

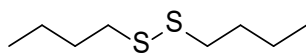

**1,2-dibutyl disulfane(2x)**<sup>19</sup> Colorless oil (17.8 mg, >99%). (hexane as TLC eluent). <sup>1</sup>H NMR (400 MHz, CDCl<sub>3</sub>) δ 2.85 – 2.54 (m, 4H), 1.66 (tt, J = 7.6, 6.3 Hz, 8H), 1.42 (q, J = 7.5 Hz, 6H), 0.92 (t, J = 7.3 Hz, 2H). <sup>13</sup>C NMR (100 MHz, CDCl<sub>3</sub>) δ 38.9, 31.3, 21.6, 13.6. LRMS (EI) calcd for C<sub>8</sub>H<sub>18</sub>S<sub>2</sub> ([M]<sup>+</sup>): 178.08, found 178.05.

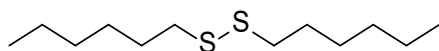

**1,2-dihexyl disulfane(2y)**<sup>20</sup> Colorless oil (23.4 mg, >99%). (hexane as TLC eluent). <sup>1</sup>H NMR (400

MHz, CDCl<sub>3</sub>) δ 2.76–2.51 (m, 4H), 1.76–1.61 (m, 4H), 1.43–1.21 (m, 12H), 0.95–0.85 (m, 6H). <sup>13</sup>C NMR (100 MHz, CDCl<sub>3</sub>) δ 39.2, 31.4, 29.2, 28.2, 22.5, 14.0. LRMS (EI) calcd for C<sub>12</sub>H<sub>26</sub>S<sub>2</sub>([M]<sup>+</sup>): 234.15, found 234.10.

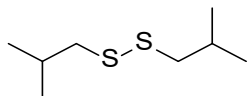

**1,2-diisobutyldisulfane(2z)<sup>21</sup>** Colorless oil (17.8 mg, >99%). (hexane as TLC eluent). <sup>1</sup>H NMR (400 MHz, CDCl<sub>3</sub>) δ 2.59 (d, *J* = 6.9 Hz, 4H), 1.94 (dp, *J* = 13.4, 6.7 Hz, 2H), 1.00 (d, *J* = 6.7 Hz, 12H). <sup>13</sup>C NMR (100 MHz, CDCl<sub>3</sub>) δ 48.5, 28.1, 21.7. LRMS (EI) *m/z* calcd for C<sub>8</sub>H<sub>18</sub>S<sub>2</sub> ([M]<sup>+</sup>): 178.08, found 178.05.

## References

1. X. B. Li, Z. J. Li, Y. J. Gao, Q. Y. Meng, S. Yu, R. G. Weiss, C. H. Tung and L. Z. Wu, *Angew Chem Int Ed Engl*, 2014, **53**, 2085-2089.
2. S. Balgotra, P. K. Verma, J. Kour, S. Gupta, R. A. Vishwakarma and S. D. Sawant, *ChemistrySelect*, 2018, **3**, 2800-2804.
3. L. J. Song, W. H. Li, W. X. Duan, J. C. An, S. Y. Tang, L. J. Li and G. Y. Yang, *Green Chem*, 2019, **21**, 1432-1438.
4. K. Y. D. Tan, G. F. Teng and W. Y. Fan, *Organometallics*, 2011, **30**, 4136-4143.
5. A. Talla, B. Driessen, N. J. W. Straathof, L.-G. Milroy, L. Brunsveld, V. Hessel and T. Noël, *Adv. Synth. Catal*, 2015, **357**, 2180-2186.
6. S. Paul and S. M. Islam, *RSC Adv*, 2016, **6**, 95753-95759.
7. J. L. Howard, C. Schotten, S. T. Alston and D. L. Browne, *Chem Commun*, 2016, **52**, 8448-8451.
8. T. Chatterjee and B. C. Ranu, *RSC Adv*, 2013, **3**, 10680-10686.
9. K. V. Ruddaraju, Z. D. Parsons, C. D. Lewis and K. S. Gates, *J. Org. Chem*, 2017, **82**, 776-780.
10. A. V. Namanloo, B. Akhlaghinia and A. Mohammadinezhad, *J. Sulfur. Chem*, 2020, **41**, 446-461.
11. Y. Q. Wang, J. D. Deng, J. H. Chen, F. Cao, Y. S. Hou, Y. H. Yang, X. M. Deng, J. R. Yang, L. X. Wu, X. F. Shao, T. Shi and Z. Wang, *ACS Catal*, 2020, **10**, 2707-2712.
12. S. H. Ryu, J. Ra and H. M. Ko, *Asian J. Org. Chem*, 2020, **9**, 933-938.
13. Y. C. Dou, X. Huang, H. Wang, L. T. Yang, H. Li, B. X. Yuan and G. Y. Yang, *Green Chem*, 2017, **19**, 2491-2495.
14. M. Rajamathi, G. D. Nataraja, S. Ananthamurthy and P. V. Kamath, *J. Mater. Chem*, 2000, **10**, 2754-2753.
15. S. C. Banfield, A. T. Omori, H. Leisch and T. Hudlicky, *J. Org. Chem*, 2007, **72**, 4989-4992.
16. L. T. Yang, S. D. Li, Y. C. Dou, S. Zhen, H. Li, P. K. Zhang, B. X. Yuan and G. Y. Yang, *Asian J. Org. Chem*, 2017, **6**, 265-268.
17. A. R. Hajipour, S. Safai and A. E. Ruoho, *J. Sulfur. Chem*, 2007, **27**, 441-444.
18. D. Bhattacharjee, A. Sufian, S. K. Mahato, S. Begum, K. Banerjee, S. De, H. K. Srivastava and K. P. Bhabak, *Chem Commun (Camb)*, 2019, **55**, 13534-13537.
19. A. D. Hudwekar, P. K. Verma, J. Kour, S. Balgotra and S. D. Sawant, *Eur. J. Org. Chem*, 2019, 1242-1250.

20. H. Huang, J. Ash and J. Y. Kang, *Org. Biomol. Chem*, 2018, **16**, 4236-4242.
21. G. Singh, P. K. Khatri, S. K. Ganguly and S. L. Jain, *RSC Adv*, 2014, **4**, 29124-29130.

The NMR Spectra of all products

1,2-bis(4-methoxyphenyl)disulfane (**2a**)

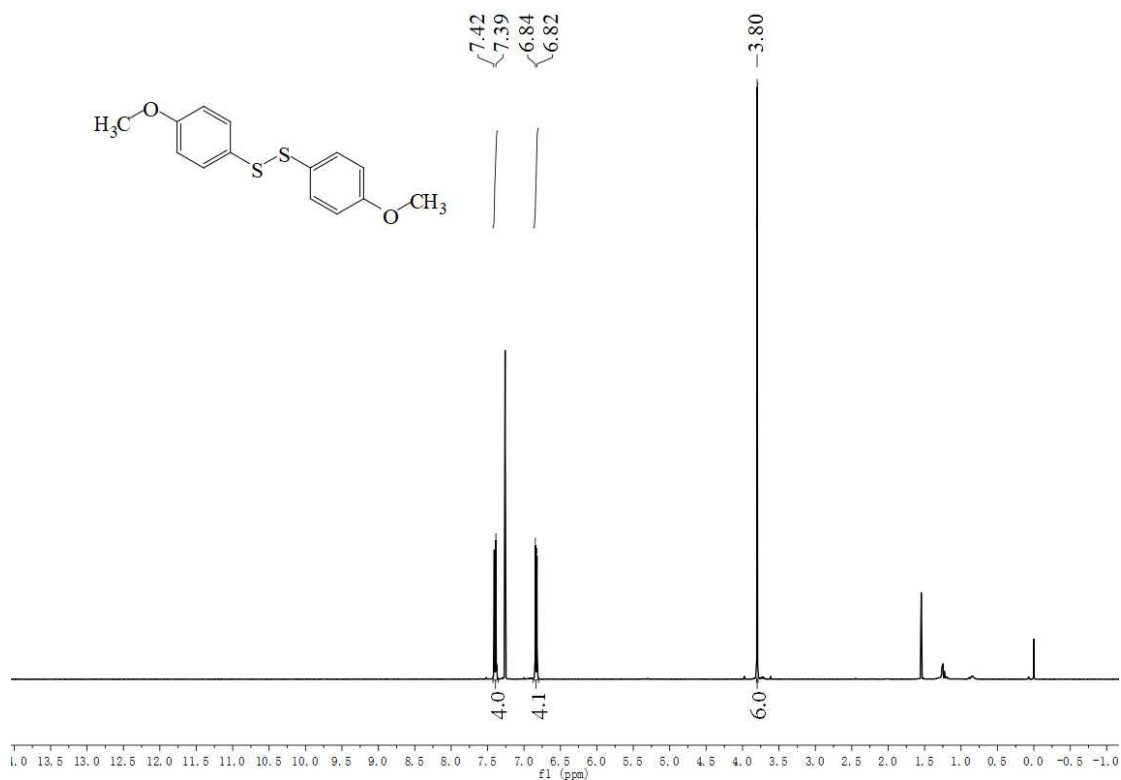

<sup>1</sup>H NMR (CDCl<sub>3</sub>, 400 MHz) of **2a**

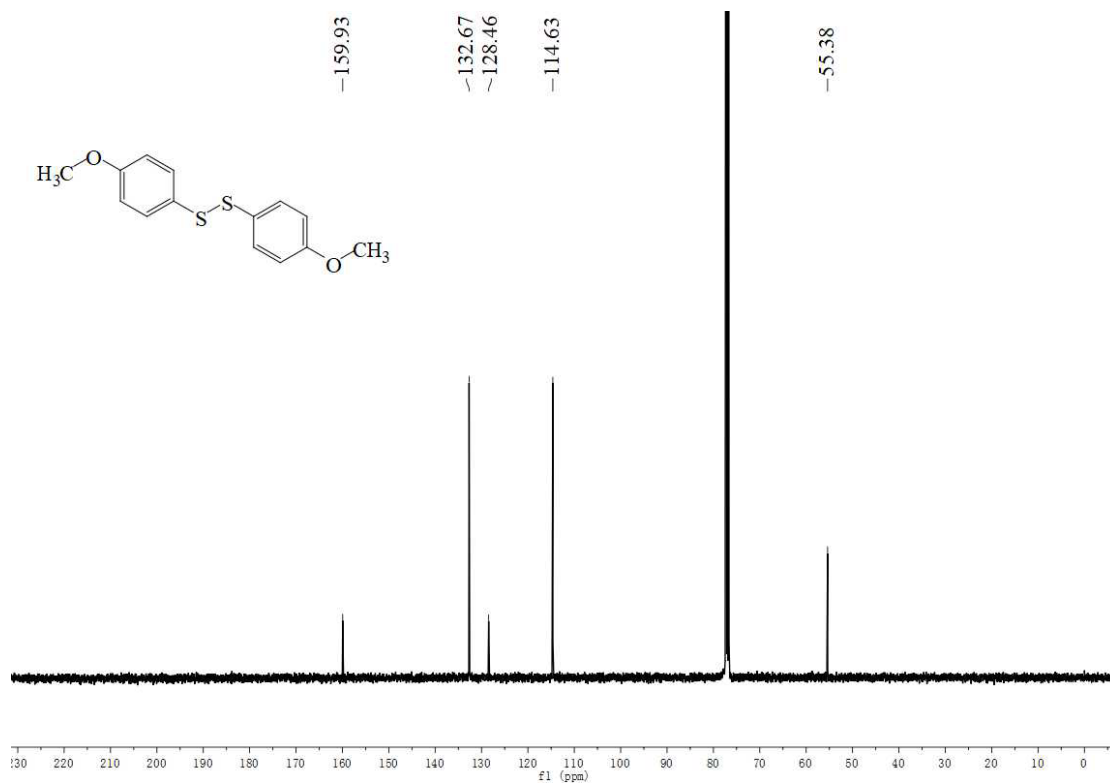

<sup>13</sup>C NMR (CDCl<sub>3</sub>, 100 MHz) of **2a**

**1,2-bis(2-methoxyphenyl)disulfane (2b)**

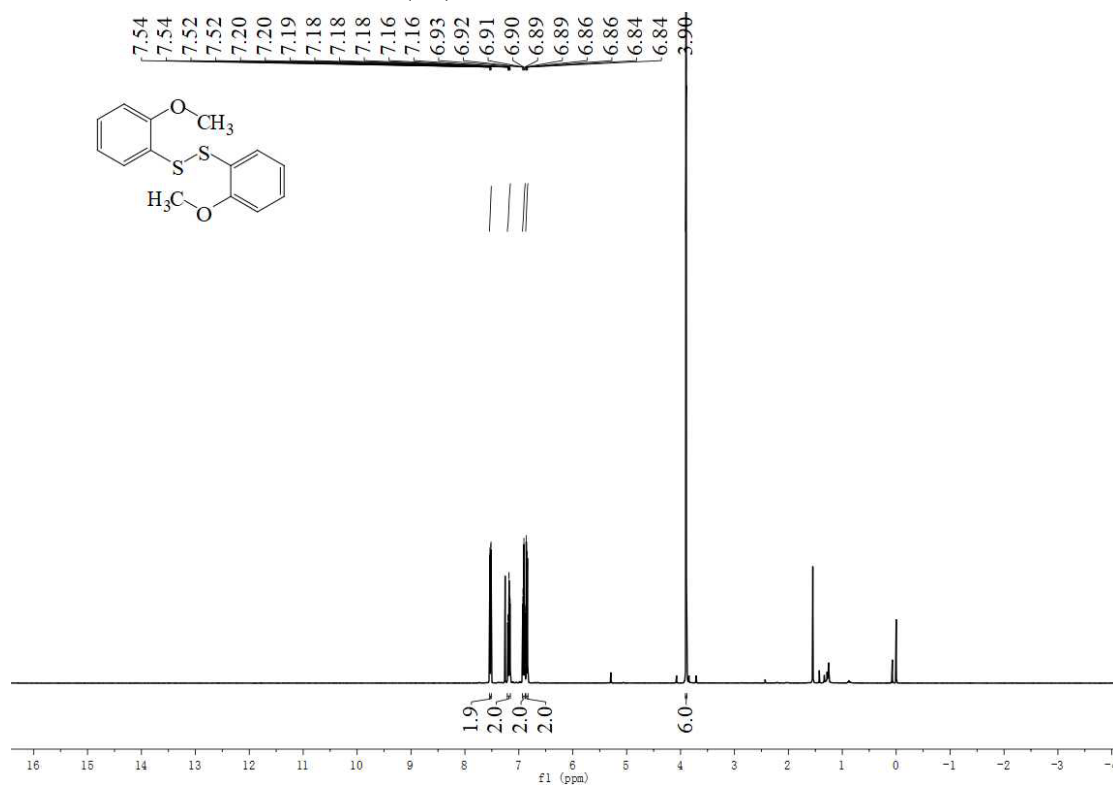

<sup>1</sup>H NMR (CDCl<sub>3</sub>, 400 MHz) of **2b**

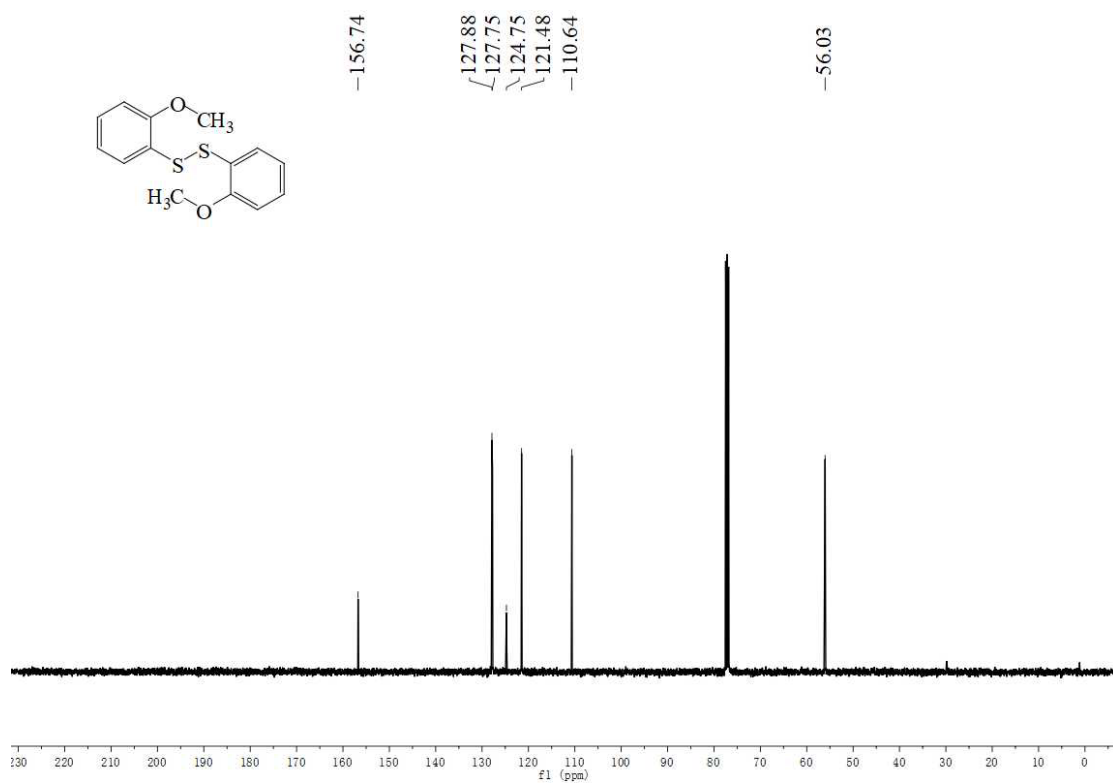

<sup>13</sup>C NMR (CDCl<sub>3</sub>, 100 MHz) of **2b**



**1,2-bis(3,4-dimethoxyphenyl)disulfane (2c)**

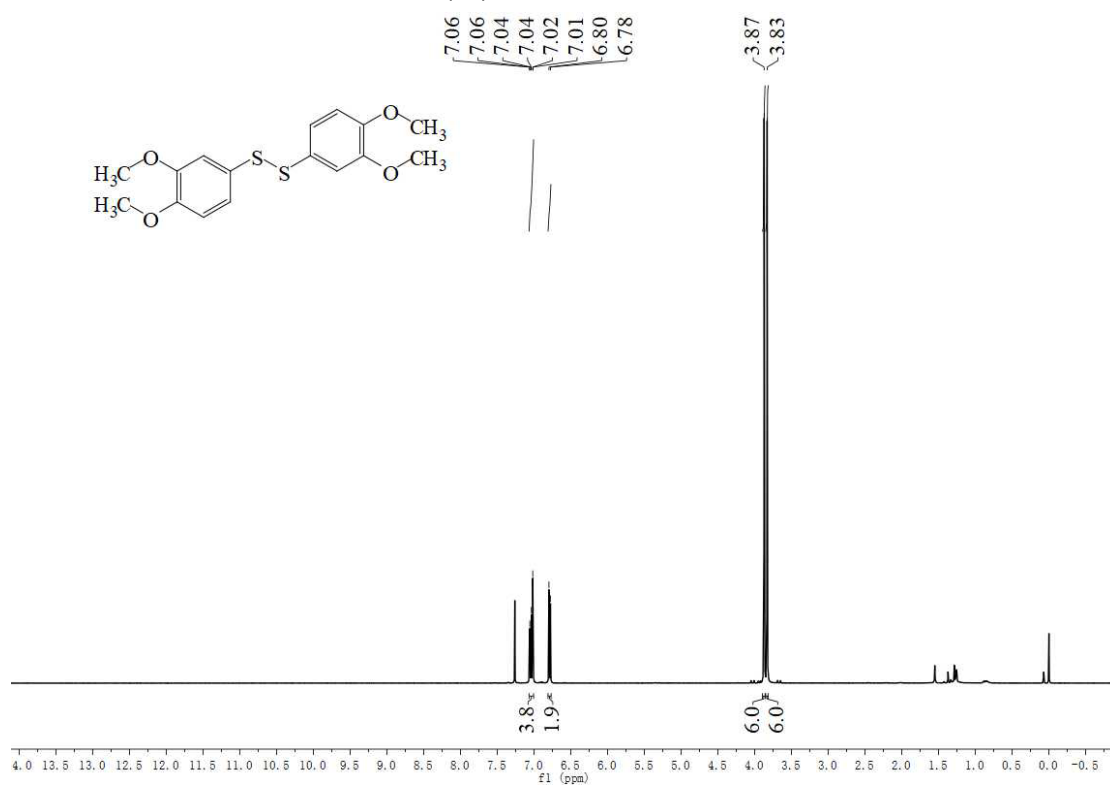

**<sup>1</sup>H NMR (CDCl<sub>3</sub>, 400 MHz) of 2c**

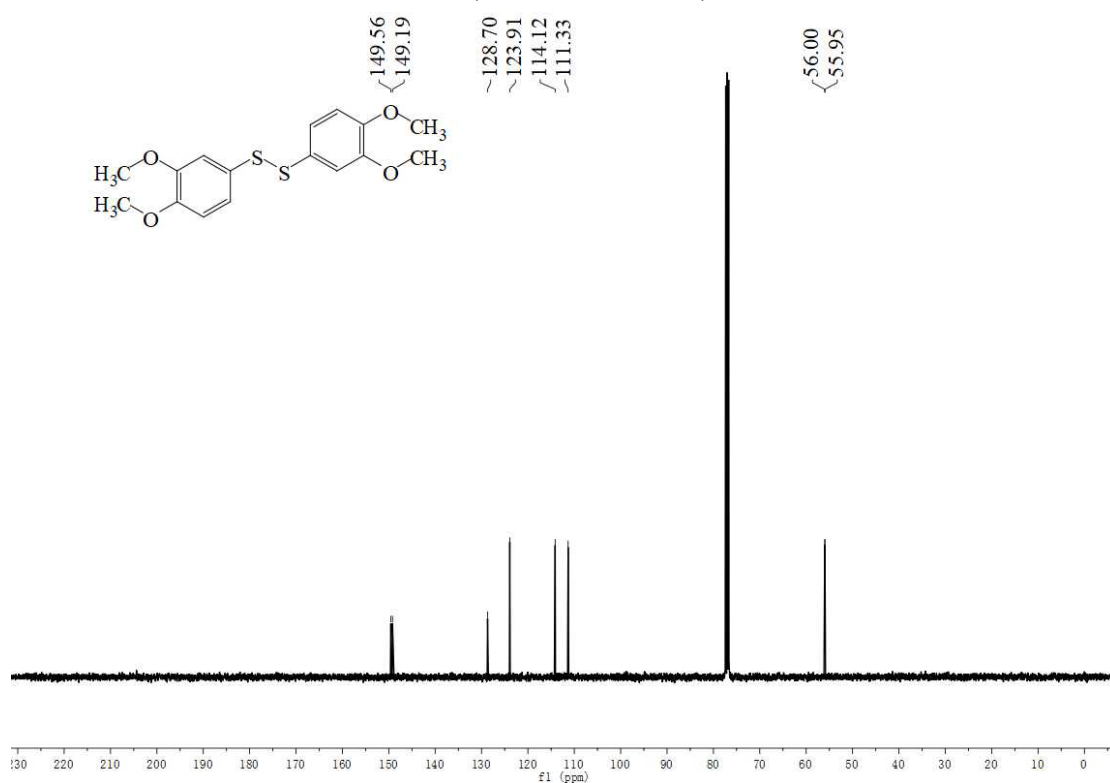

**<sup>13</sup>C NMR (CDCl<sub>3</sub>, 100 MHz) of 2c**

**4,4'-disulfaneyldianiline (2d)**

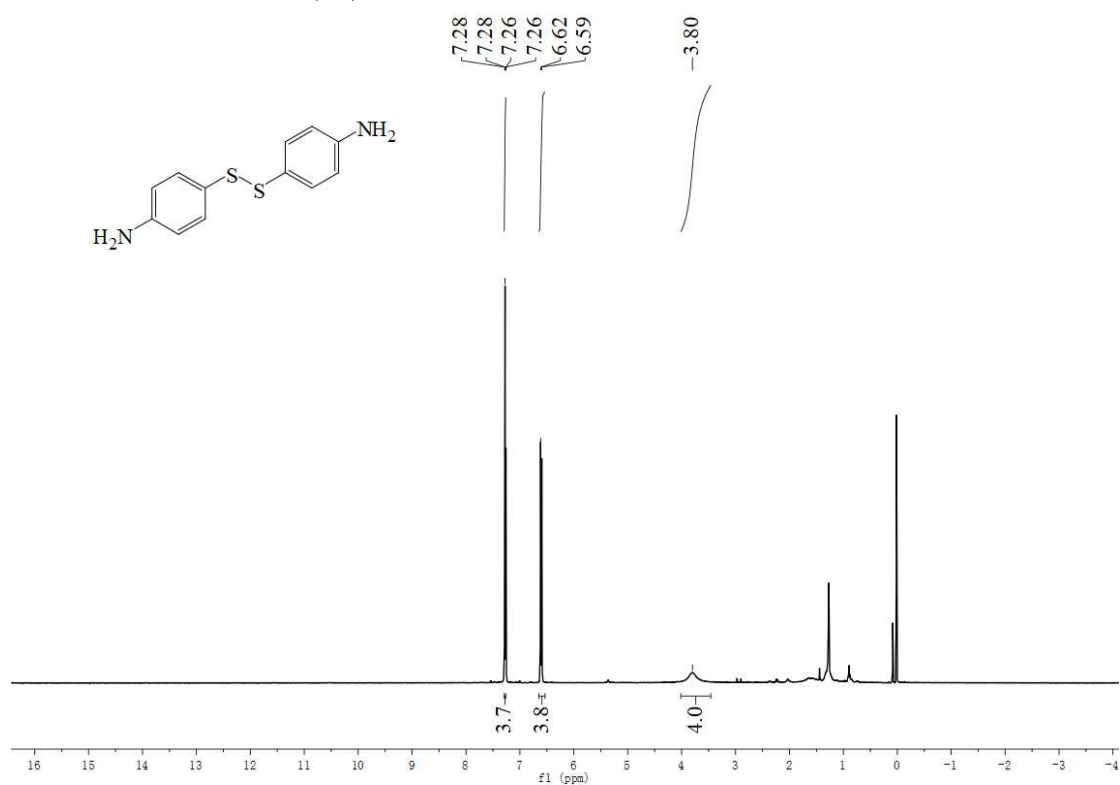

**<sup>1</sup>H NMR (CDCl<sub>3</sub>, 400 MHz) of 2d**

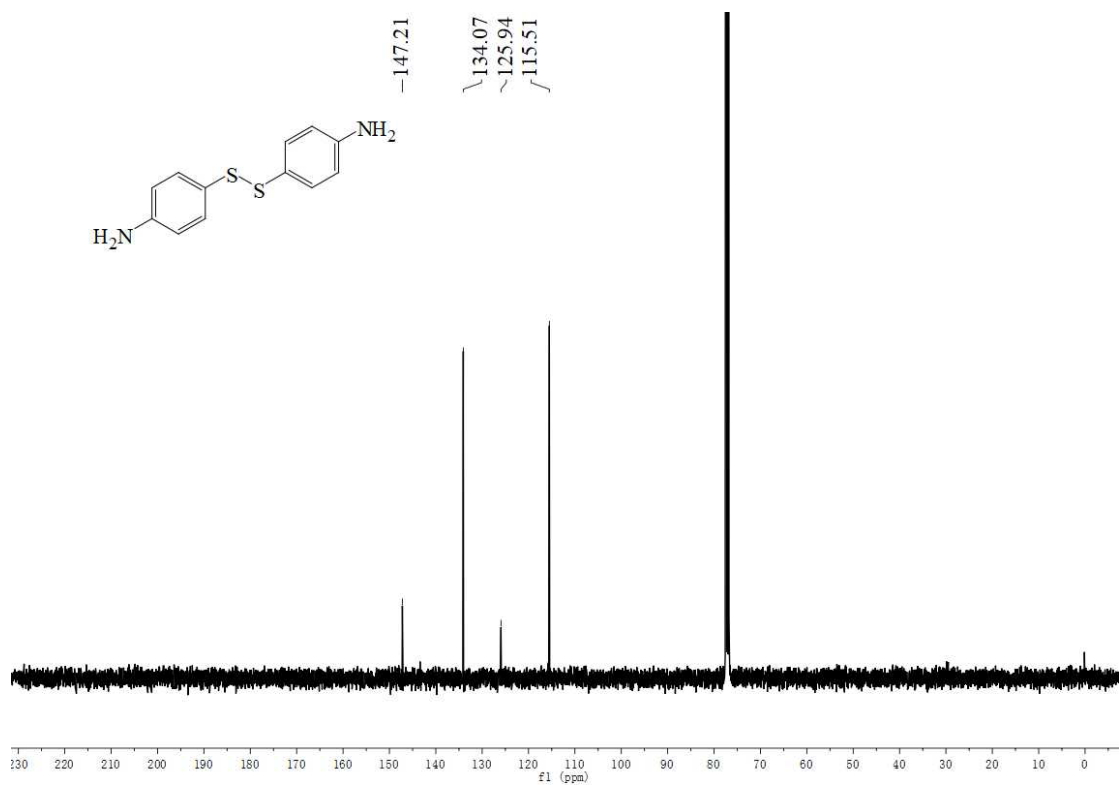

**<sup>13</sup>C NMR (CDCl<sub>3</sub>, 400 MHz) of 2d**

**2,2'-disulfanediyldianiline (2e)**

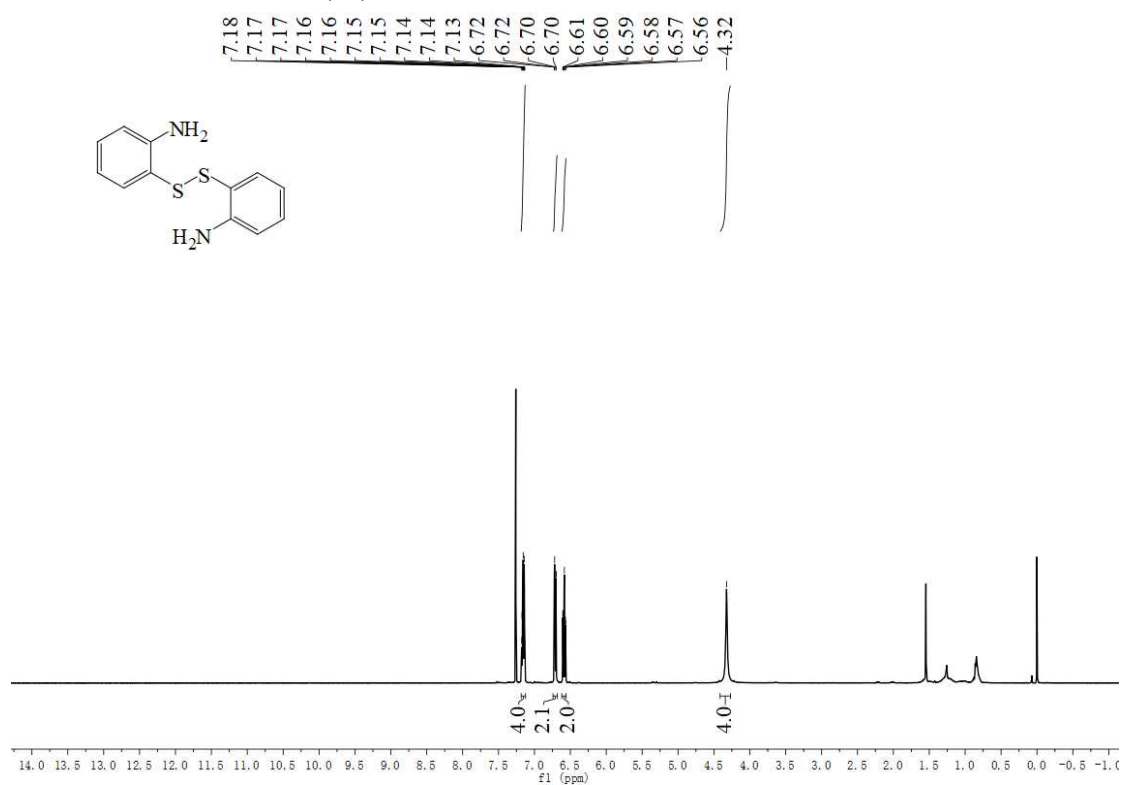

<sup>1</sup>H NMR (CDCl<sub>3</sub>, 400 MHz) of 2e

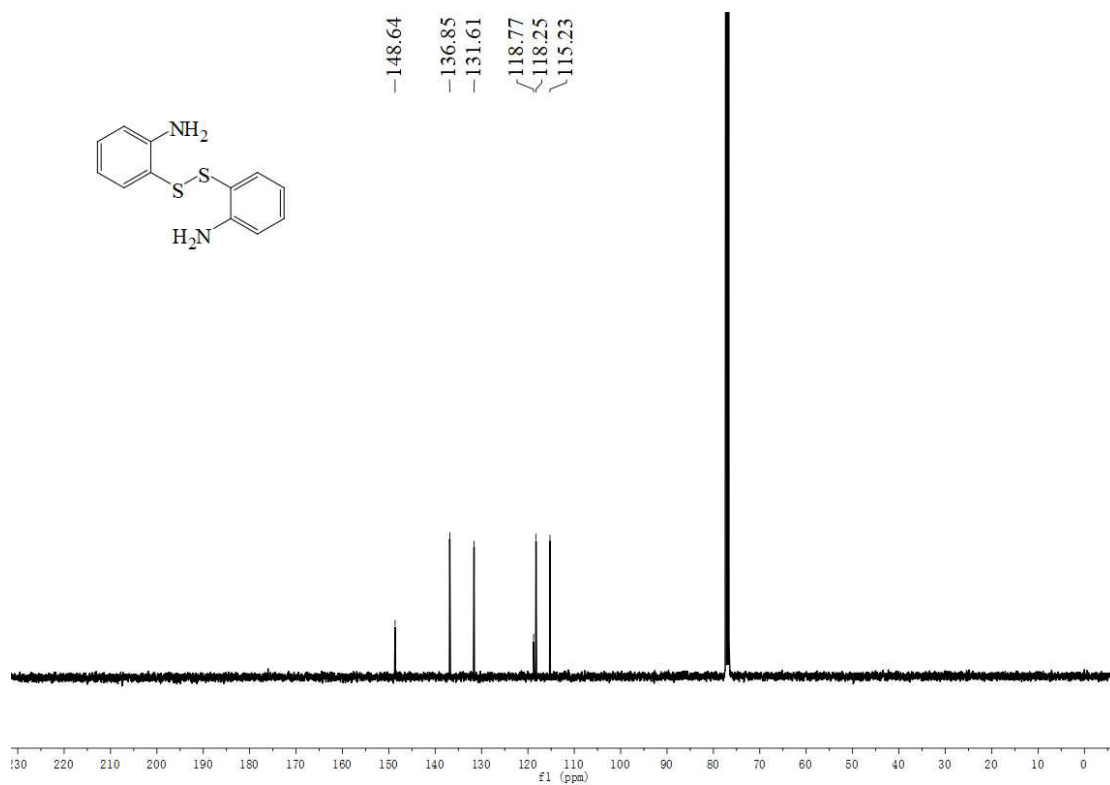

<sup>13</sup>C NMR (CDCl<sub>3</sub>, 100 MHz) of 2e

**4,4'-disulfanediylidiphenol (2f)**

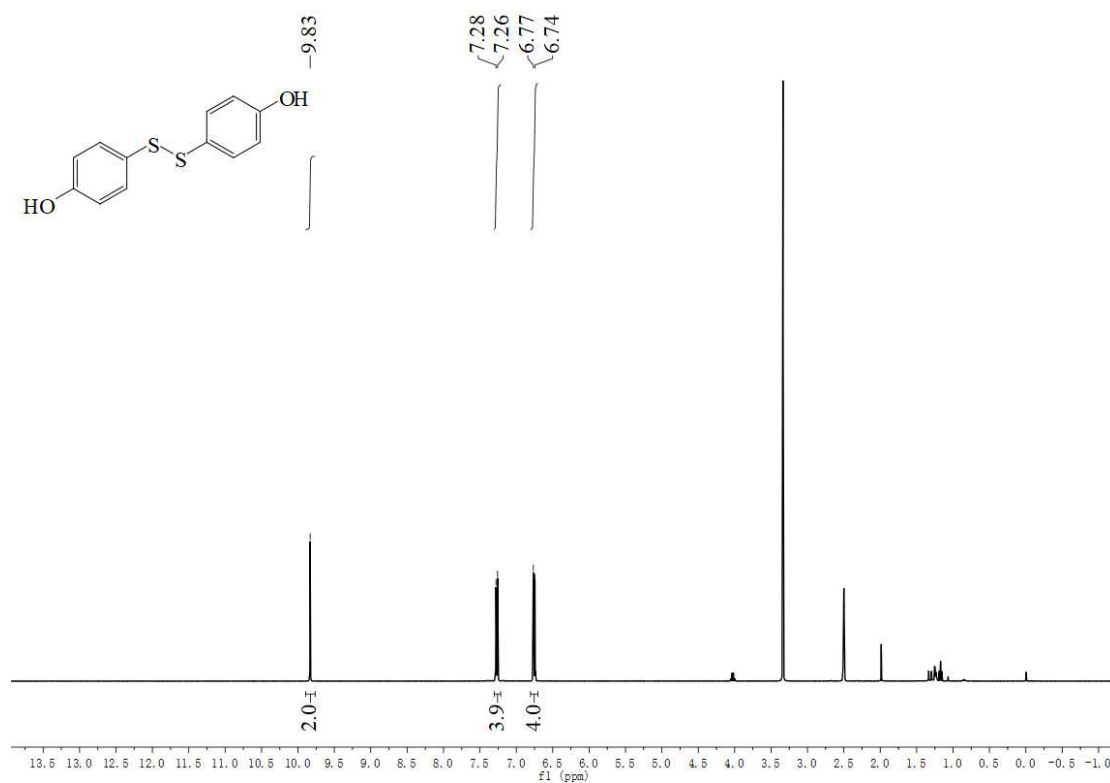

<sup>1</sup>H NMR (DMSO, 400 MHz) of **2f**

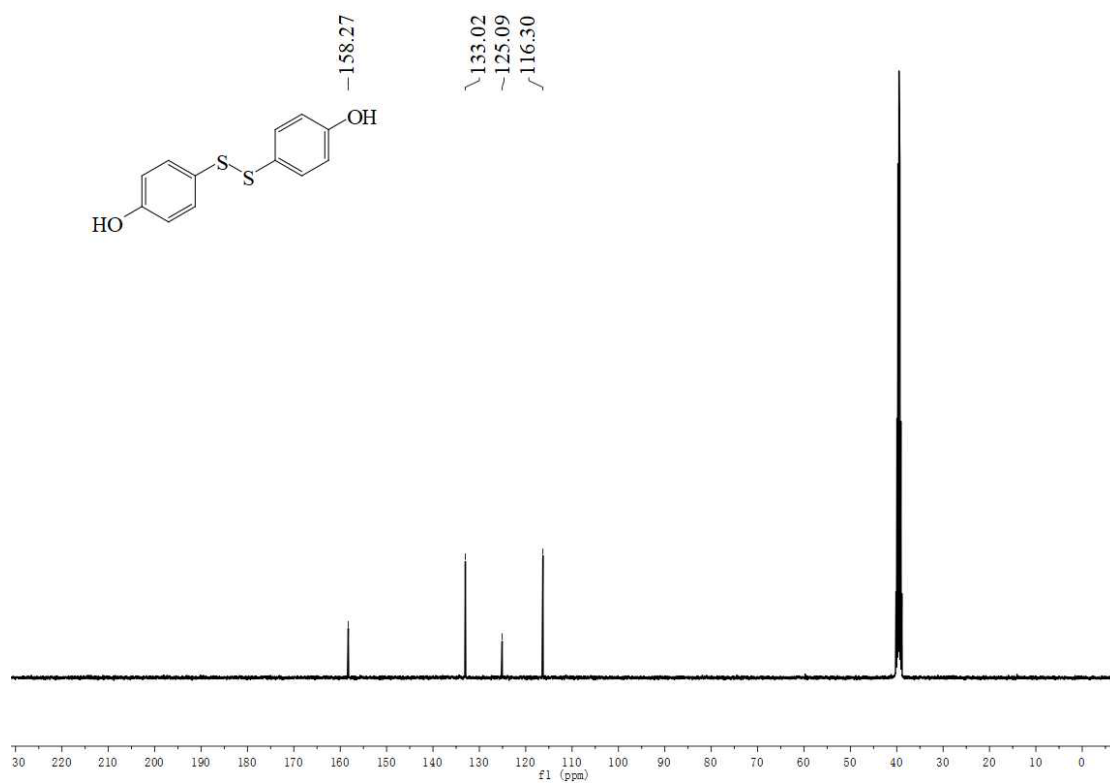

<sup>13</sup>C NMR (DMSO, 100 MHz) of **2f**

**1,2-di-p-tolyldisulfane (2g)**

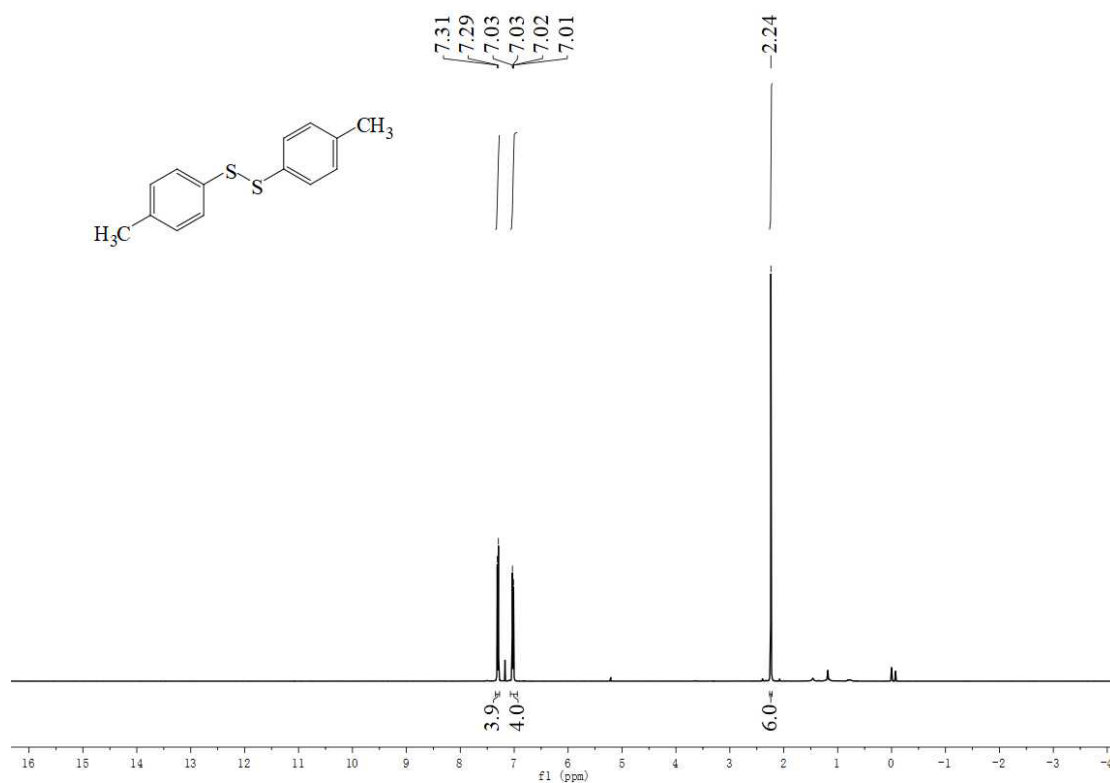

<sup>1</sup>H NMR (CDCl<sub>3</sub>, 400 MHz) of **2g**

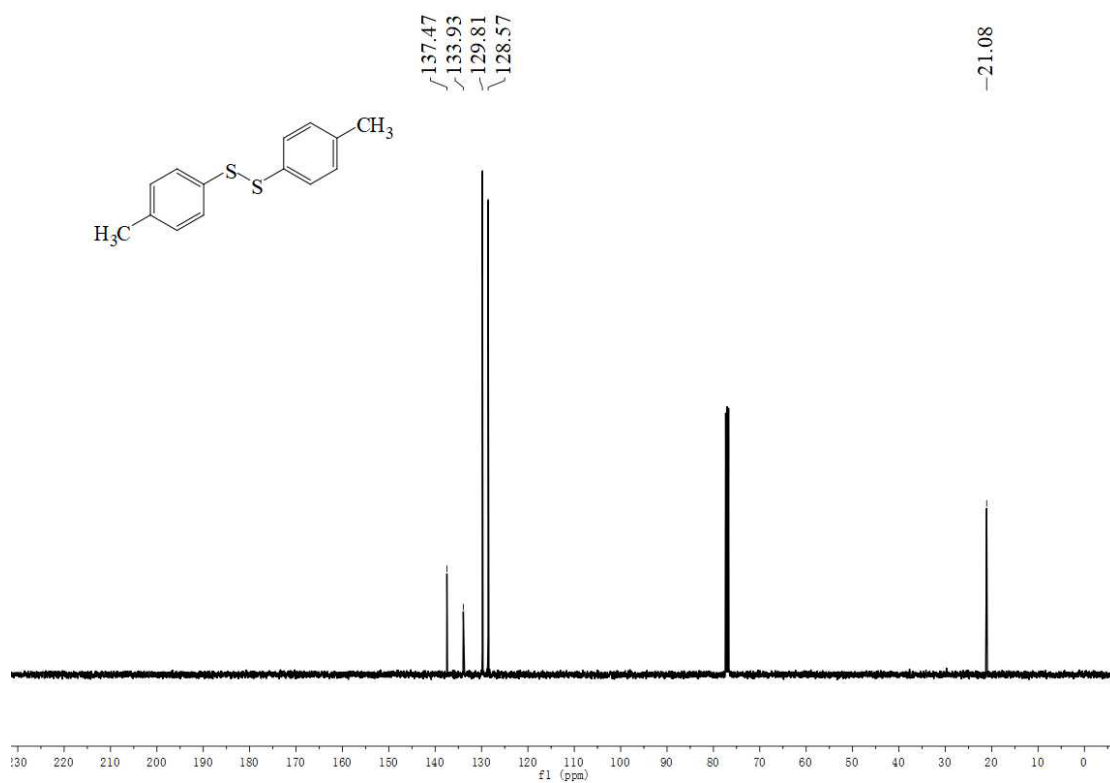

<sup>13</sup>C NMR (CDCl<sub>3</sub>, 100 MHz) of **2g**

**1,2-di-*o*-tolylsulfane (2h)**

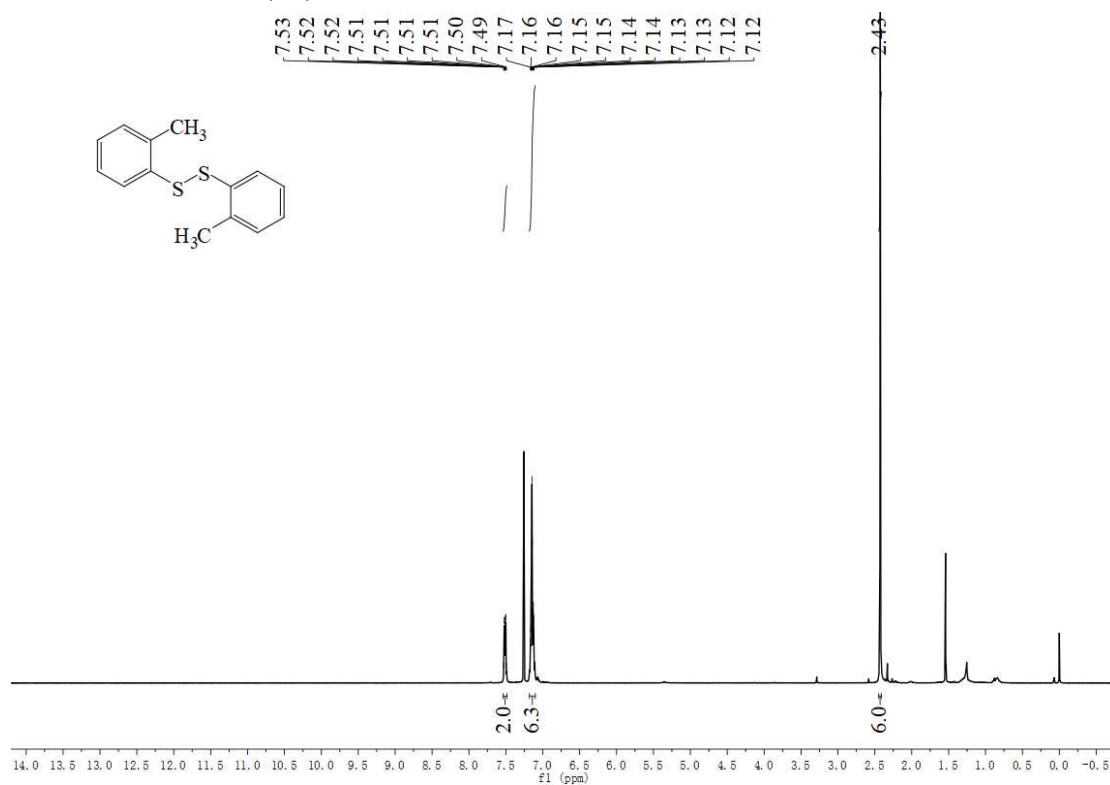

<sup>1</sup>H NMR (CDCl<sub>3</sub>, 400 MHz) of **2h**

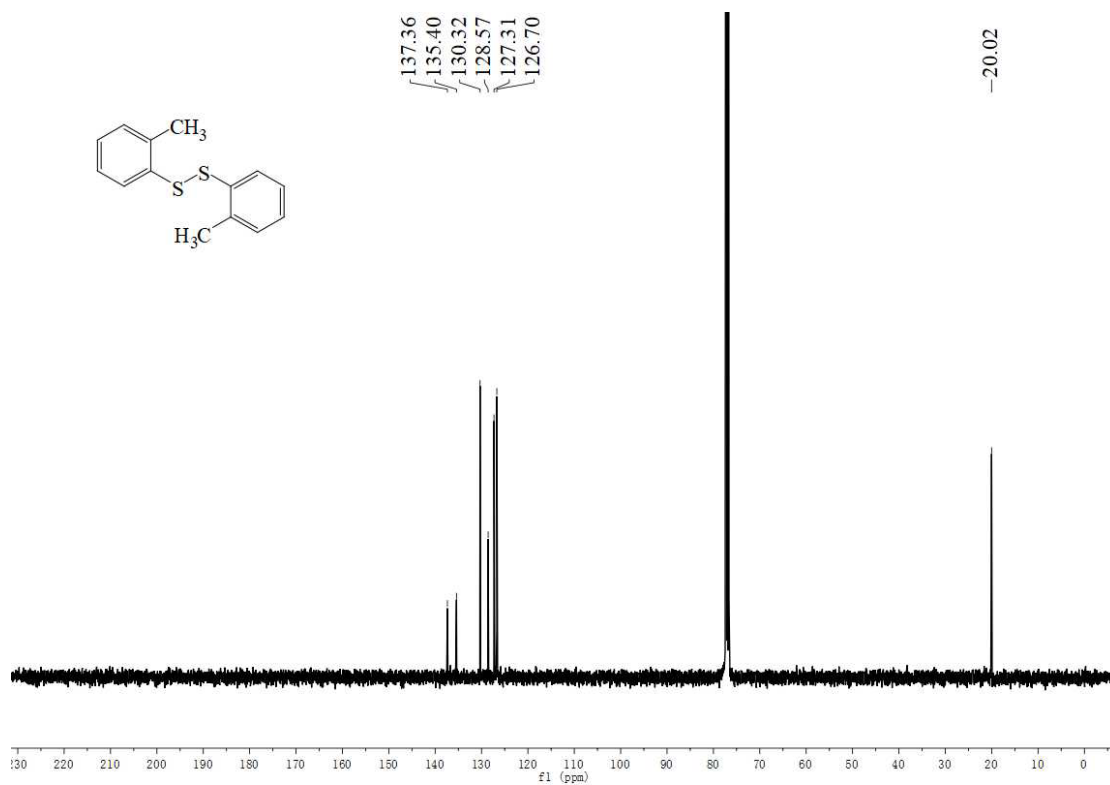

<sup>13</sup>C NMR (CDCl<sub>3</sub>, 100 MHz) of **2h**

**1,2-bis(2,4-dimethylphenyl)disulfane (2i)**

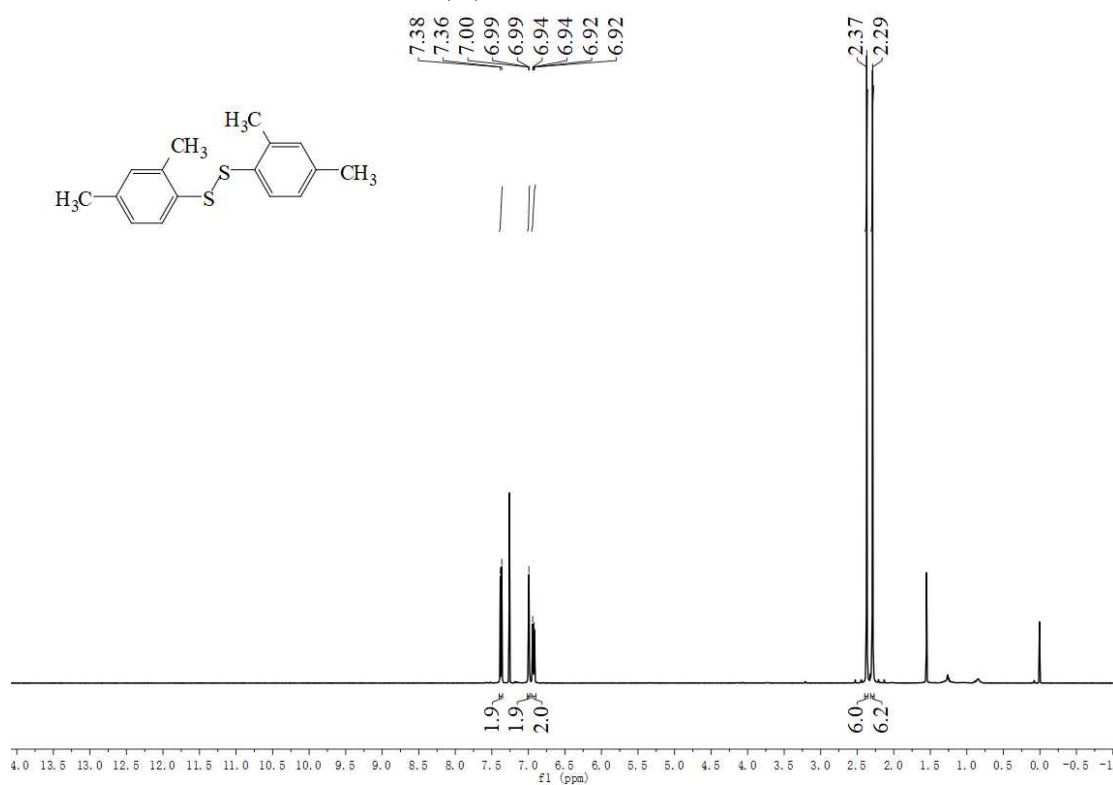

<sup>1</sup>H NMR (CDCl<sub>3</sub>, 400 MHz) of **2i**

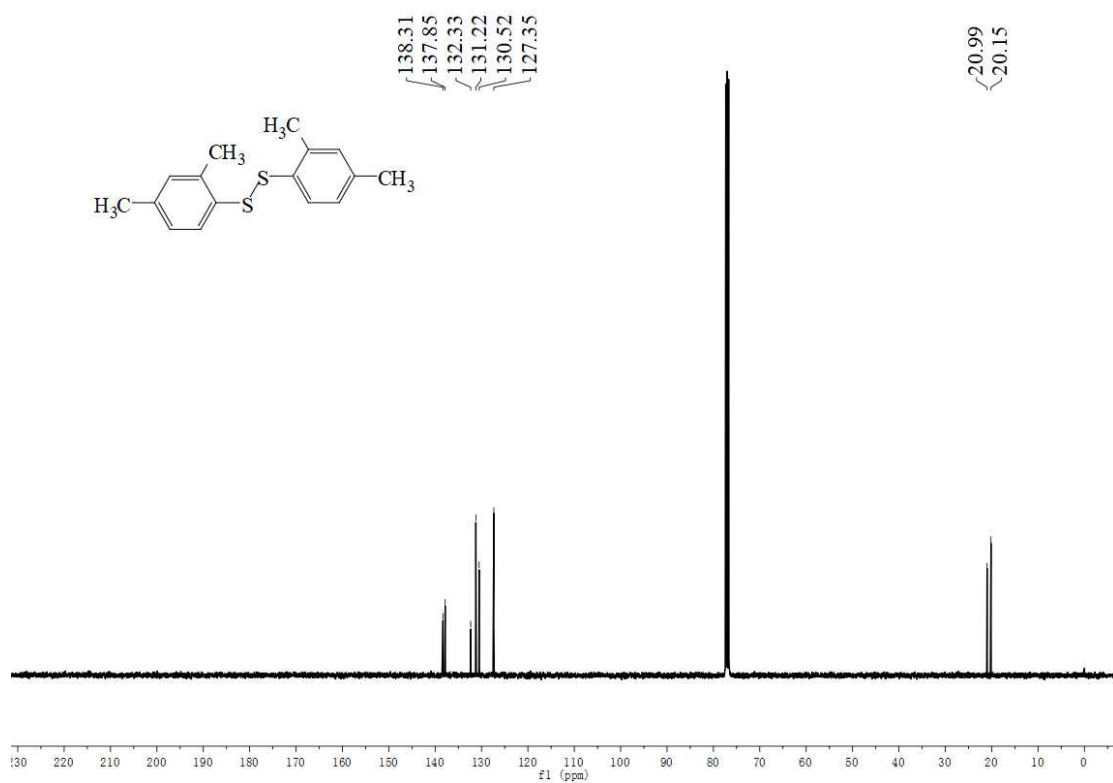

<sup>13</sup>C NMR (CDCl<sub>3</sub>, 100 MHz) of **2i**

**1,2-bis(2,6-dimethylphenyl)disulfane (2j)**

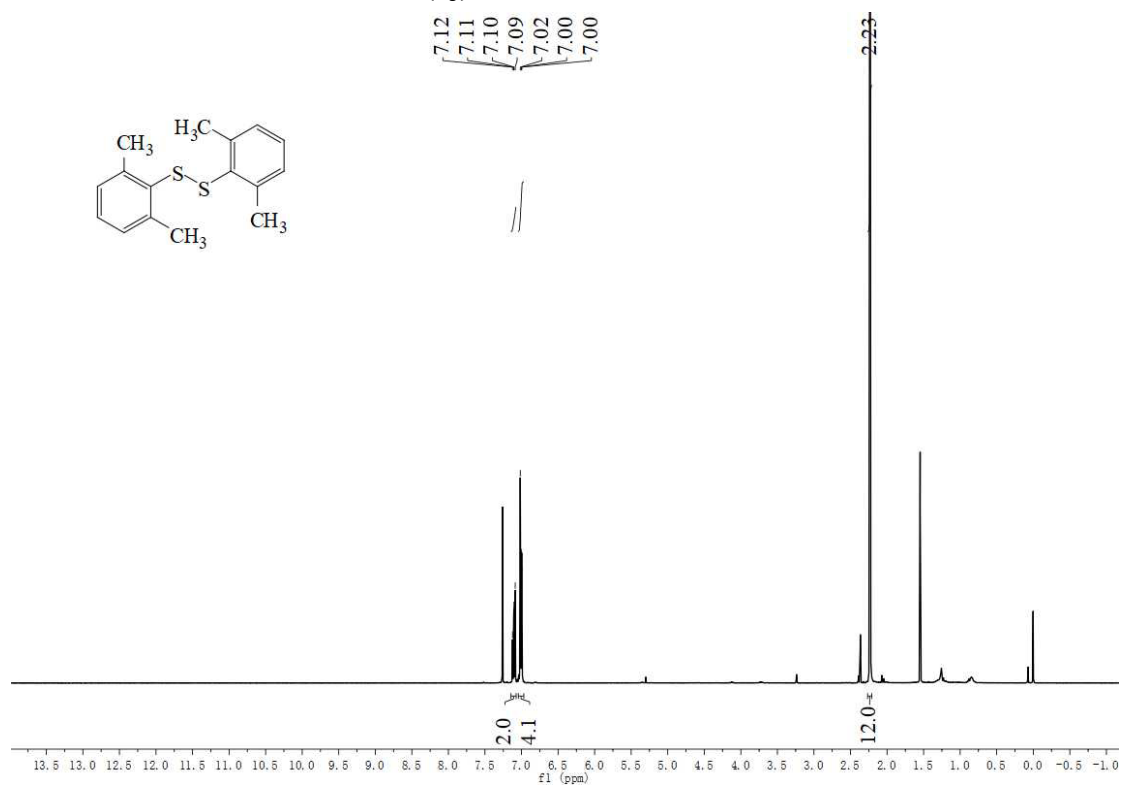

<sup>1</sup>H NMR (DMSO, 400 MHz) of **2j**

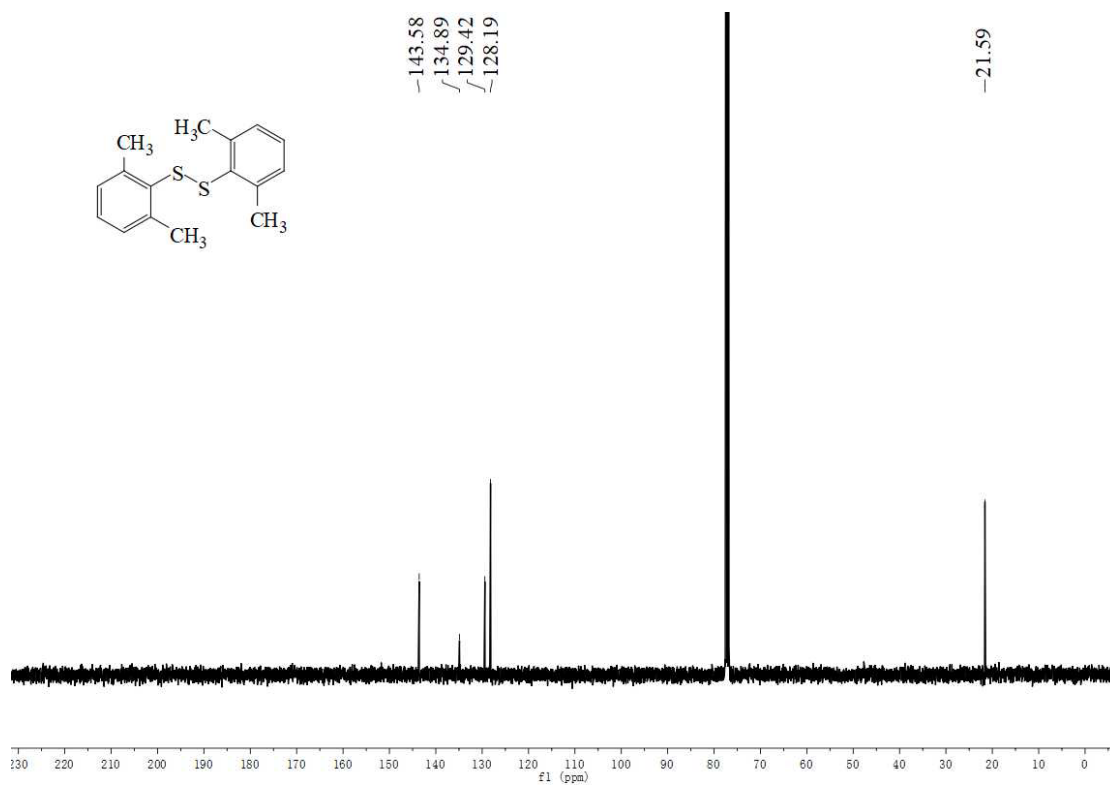

<sup>13</sup>C NMR (DMSO, 100 MHz) of **2j**



**1,2-bis(4-(tert-butyl)phenyl)disulfane (2k)**

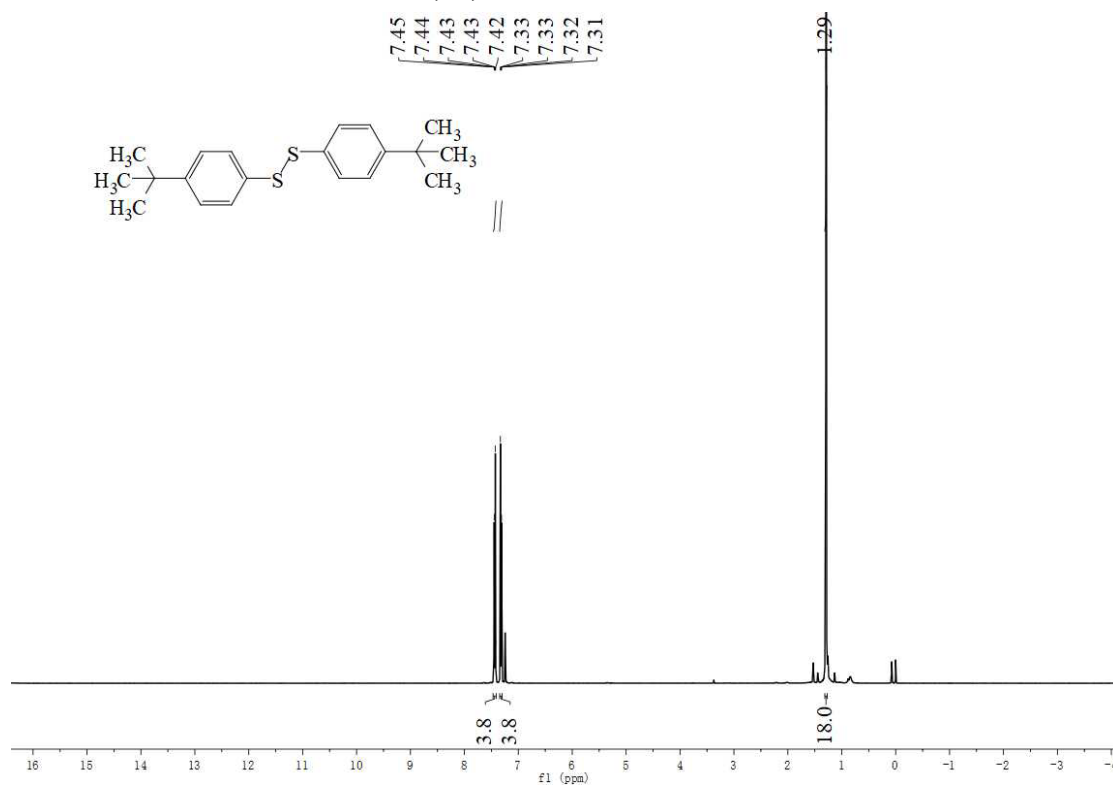

<sup>1</sup>H NMR (CDCl<sub>3</sub>, 400 MHz) of **2k**

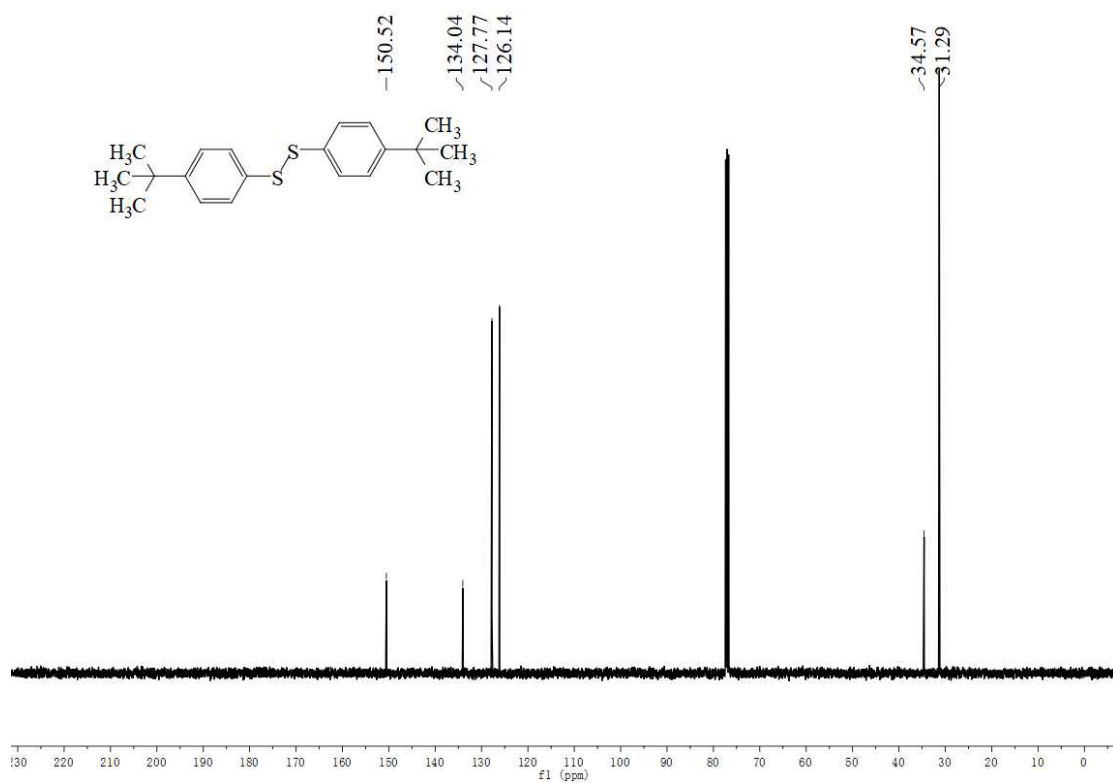

<sup>13</sup>C NMR (CDCl<sub>3</sub>, 100 MHz) of **2k**

**1,2-bis(4-chlorophenyl)disulfane (2l)**

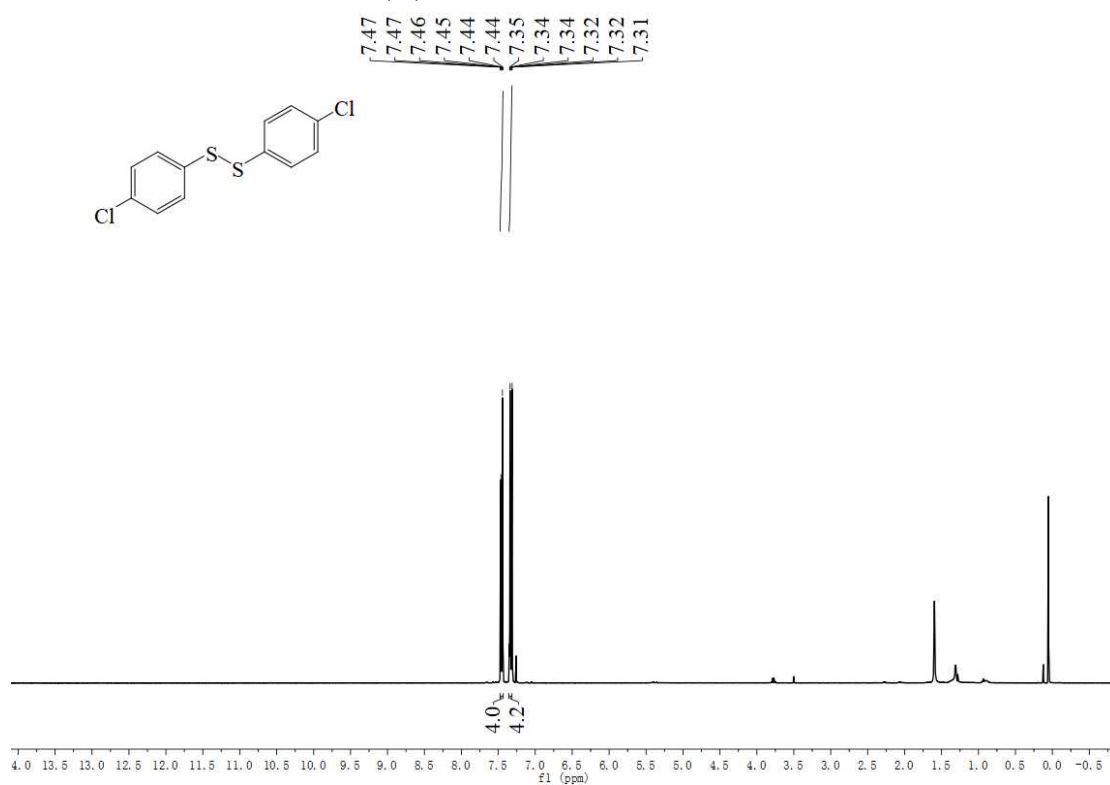

<sup>1</sup>H NMR (CDCl<sub>3</sub>, 400 MHz) of **2l**

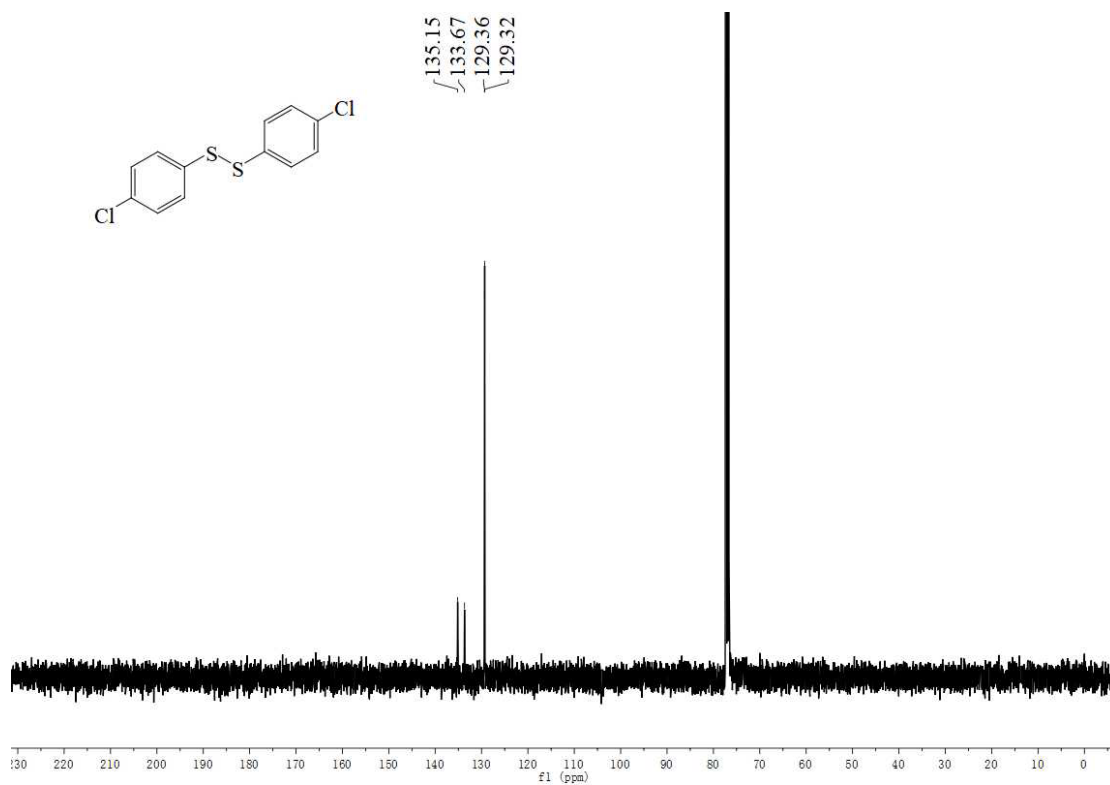

<sup>13</sup>C NMR (CDCl<sub>3</sub>, 100 MHz) of **2l**

**1,2-bis(4-fluorophenyl)disulfane (2m)**

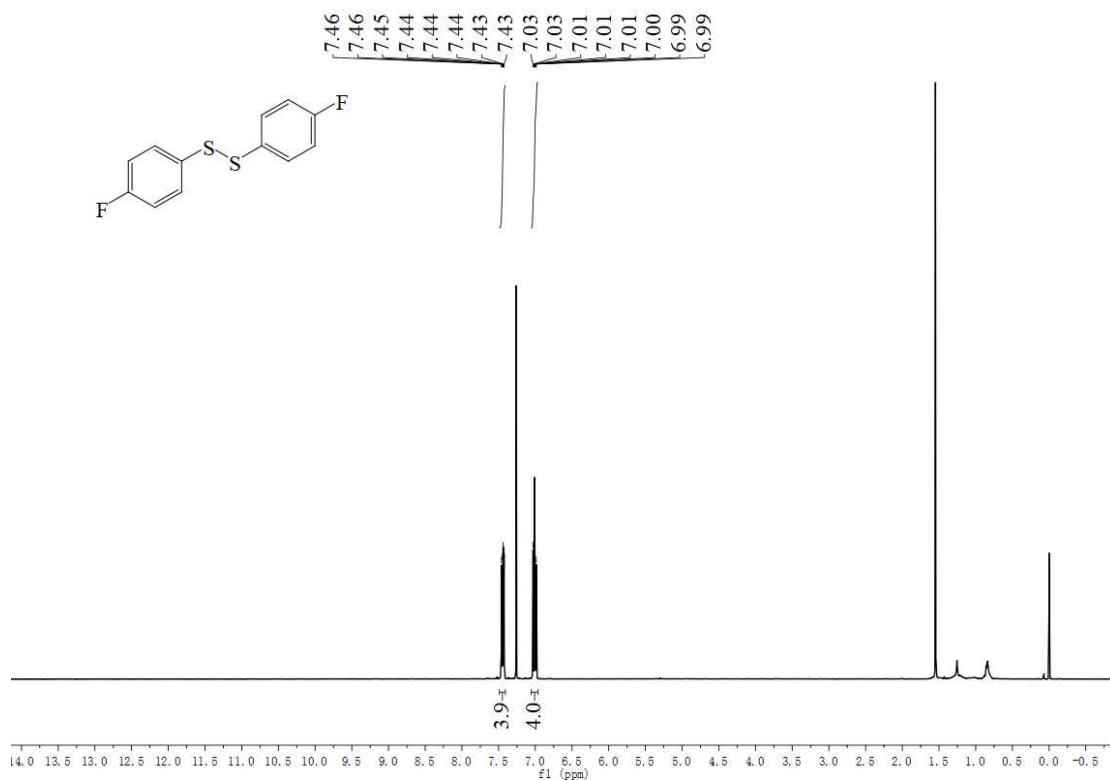

$^1\text{H NMR}$  (CDCl<sub>3</sub>, 400 MHz) of **2m**

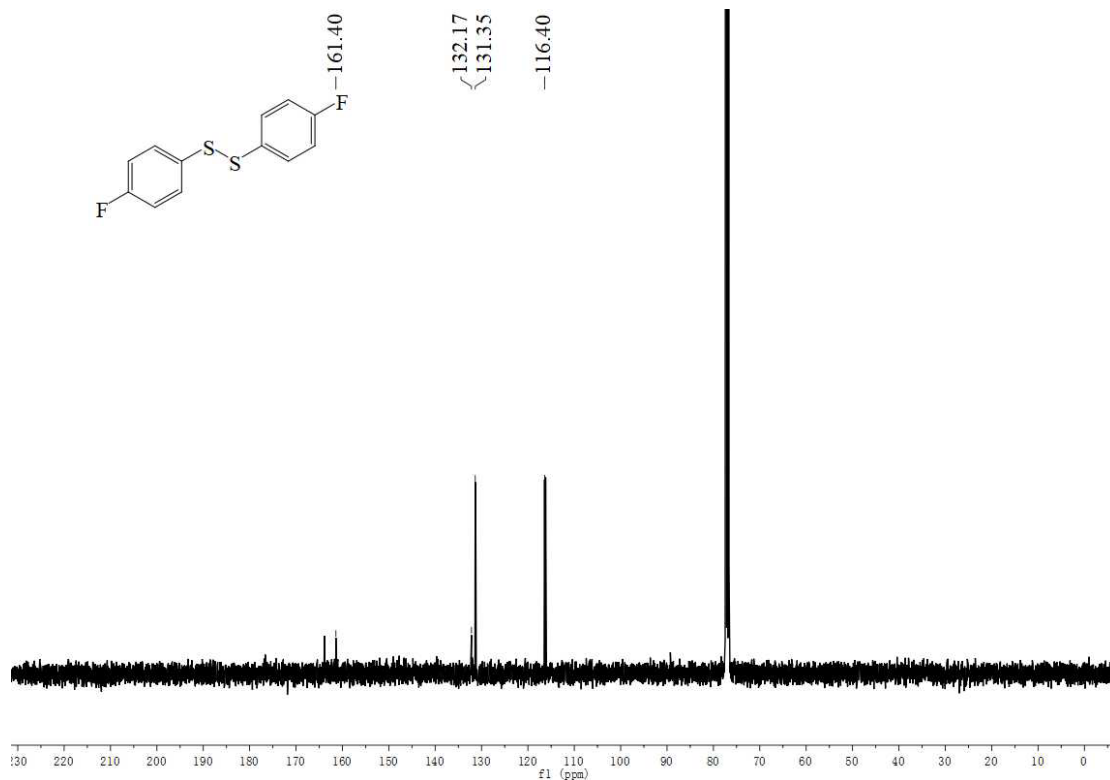

$^{13}\text{C NMR}$  (CDCl<sub>3</sub>, 100 MHz) of **2m**

*dimethyl 2,2'-disulfaneyldibenzoate (2n)*

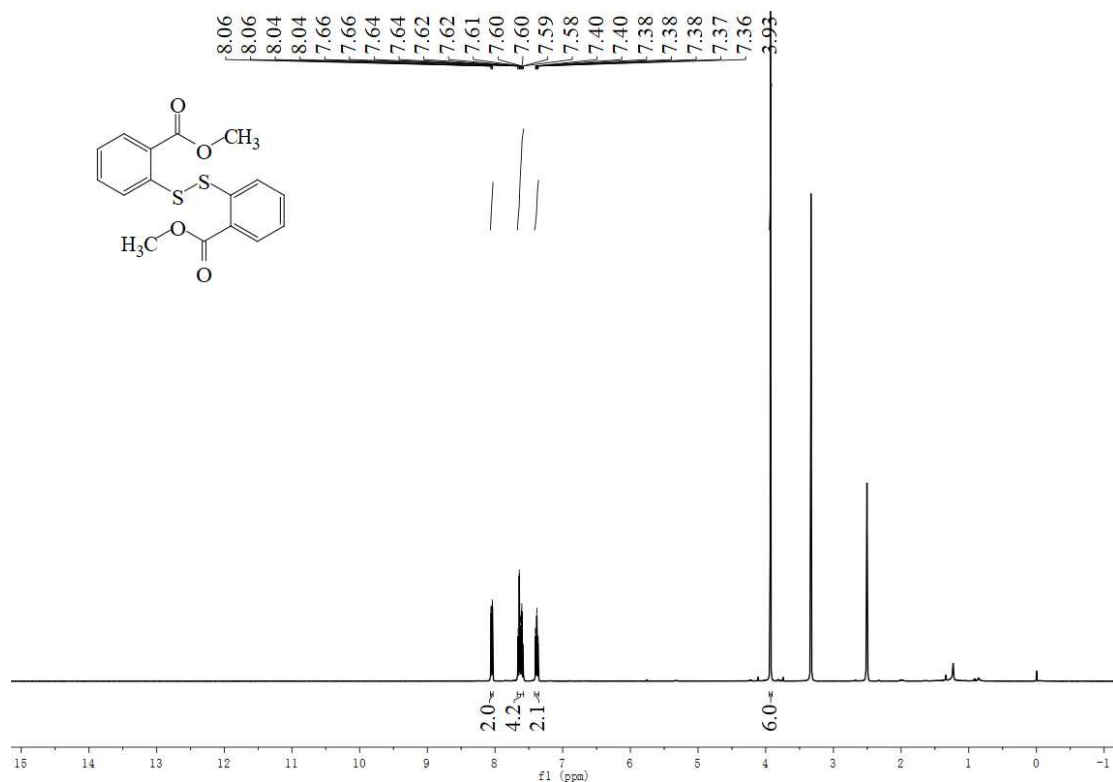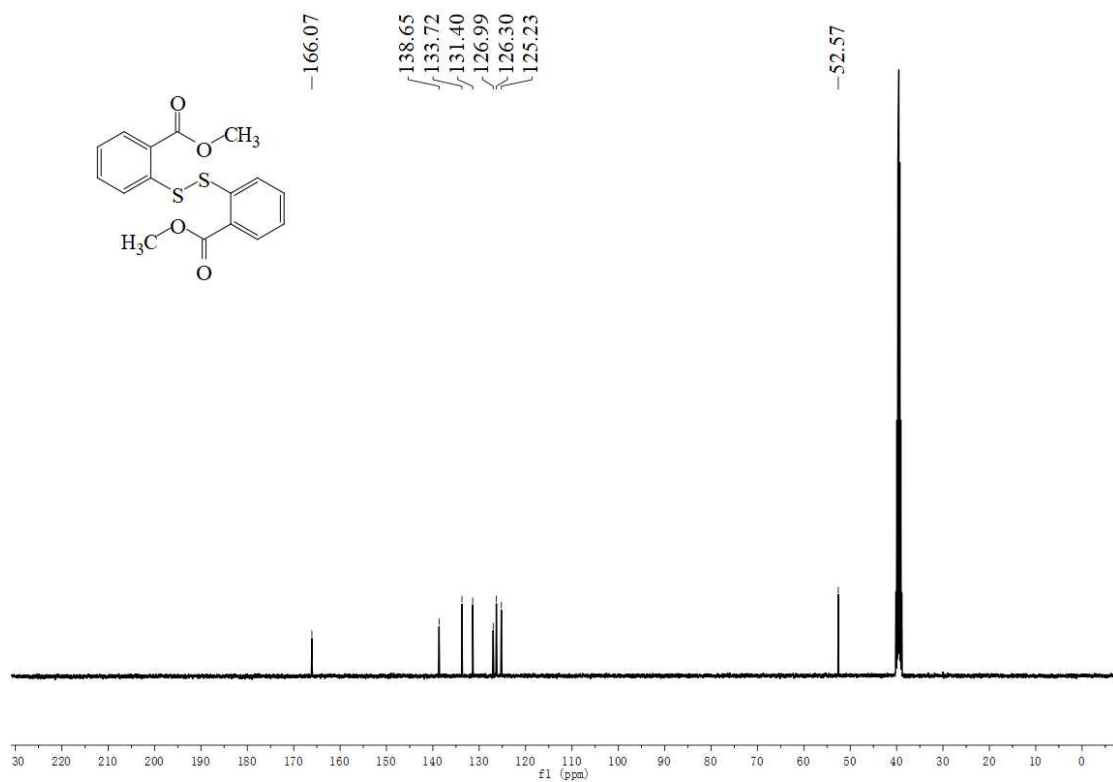

**6,6'-disulfaneylbis(3-chloroaniline) (2o)**

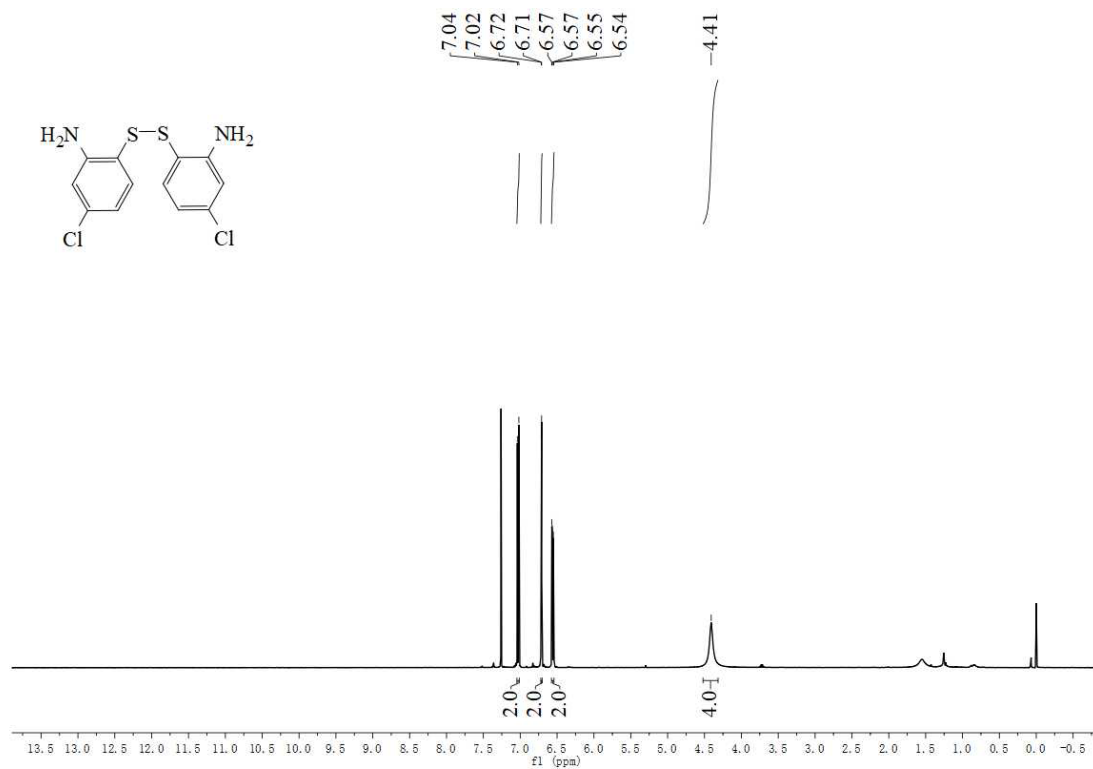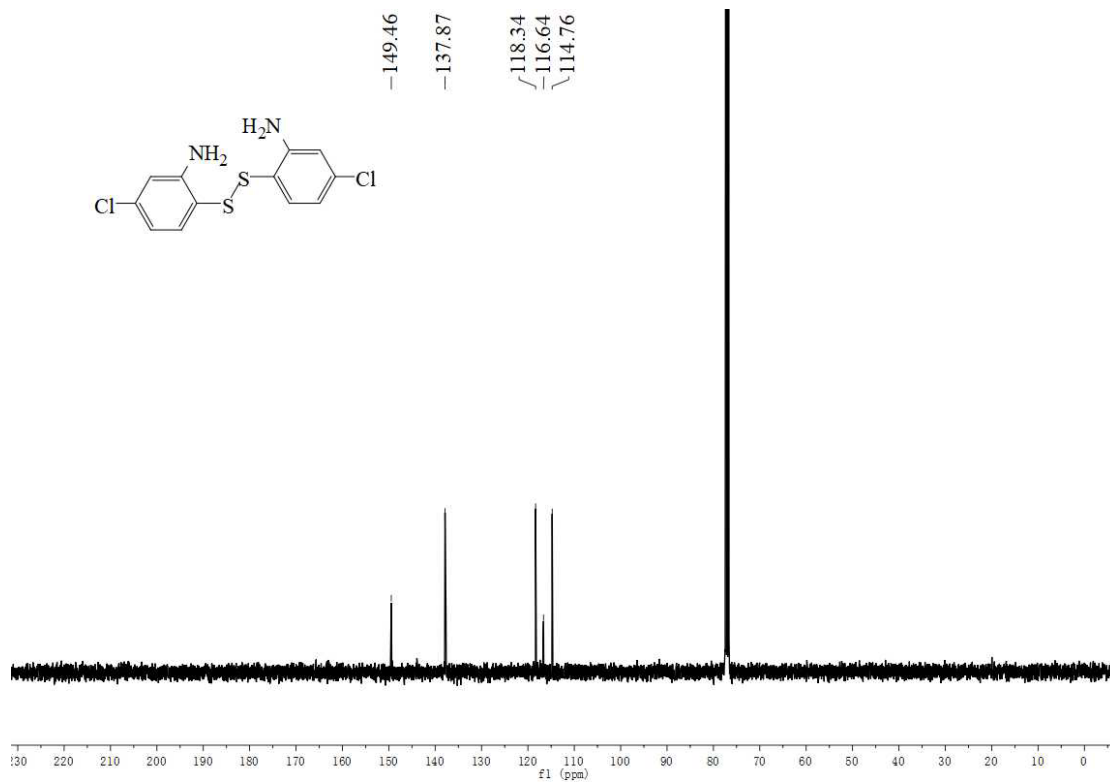

**bis(4-nitrophenyl)sulfane (2p)**

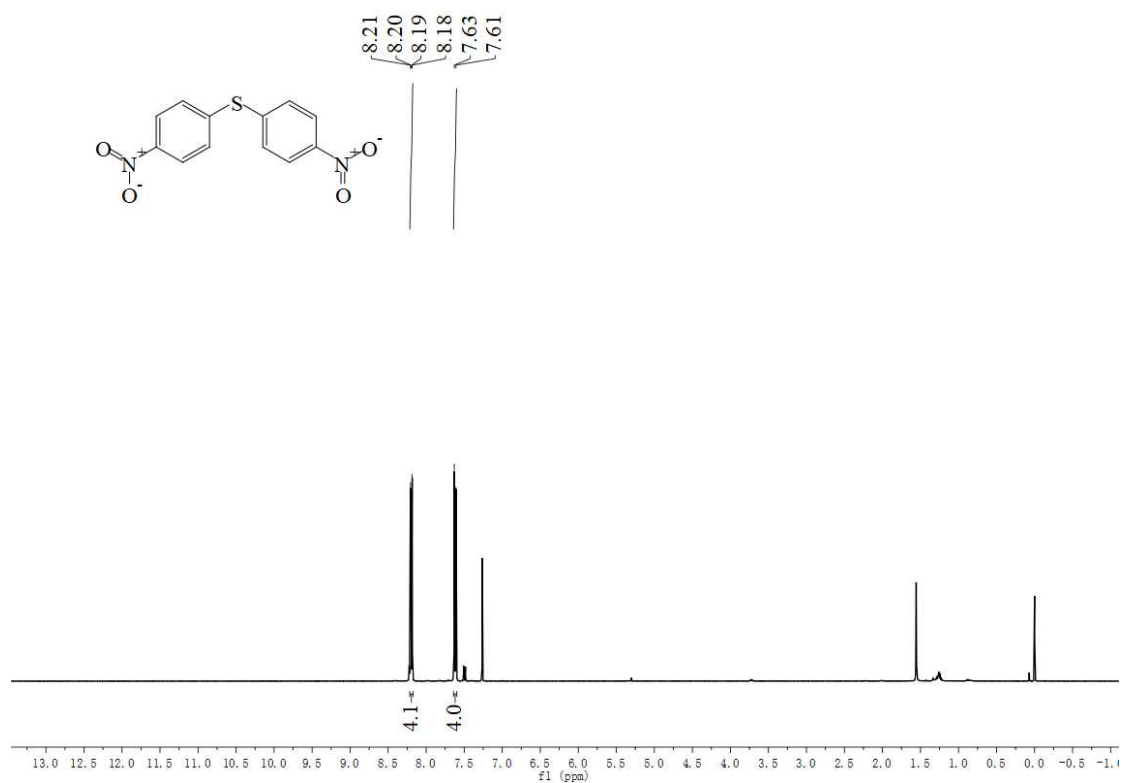

<sup>1</sup>H NMR (CDCl<sub>3</sub>, 400 MHz) of **2p**

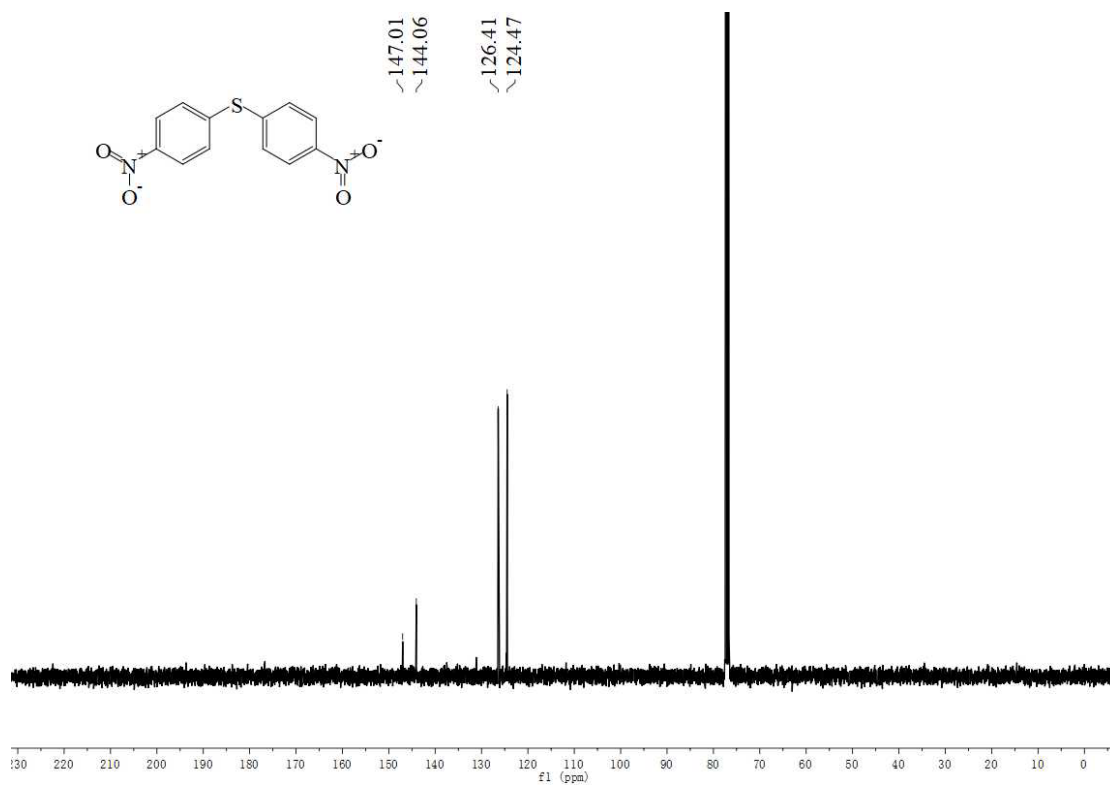

<sup>13</sup>C NMR (CDCl<sub>3</sub>, 100 MHz) of **2p**

**1,2-di(naphthalen-2-yl)disulfane (2q)**

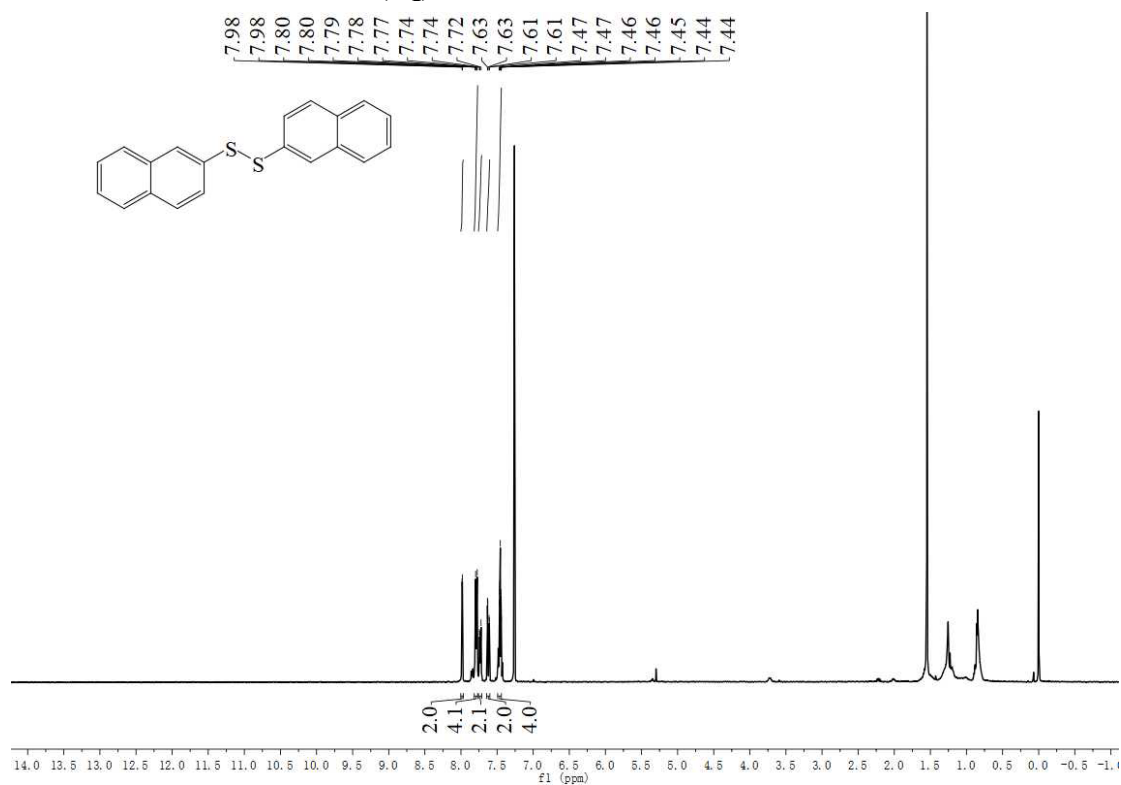

$^1\text{H NMR}$  (CDCl<sub>3</sub>, 400 MHz) of **2q**

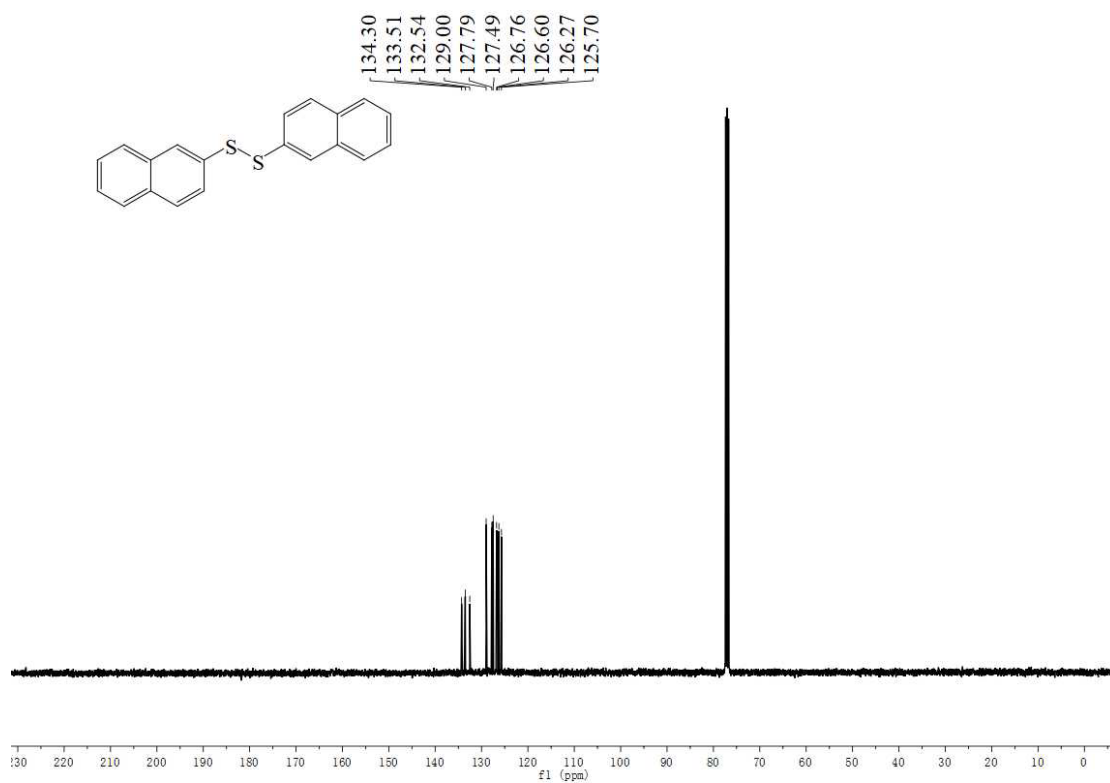

$^{13}\text{C NMR}$  (CDCl<sub>3</sub>, 100 MHz) of **2q**

**1,2-di(thiophen-2-yl)disulfane (2r)**

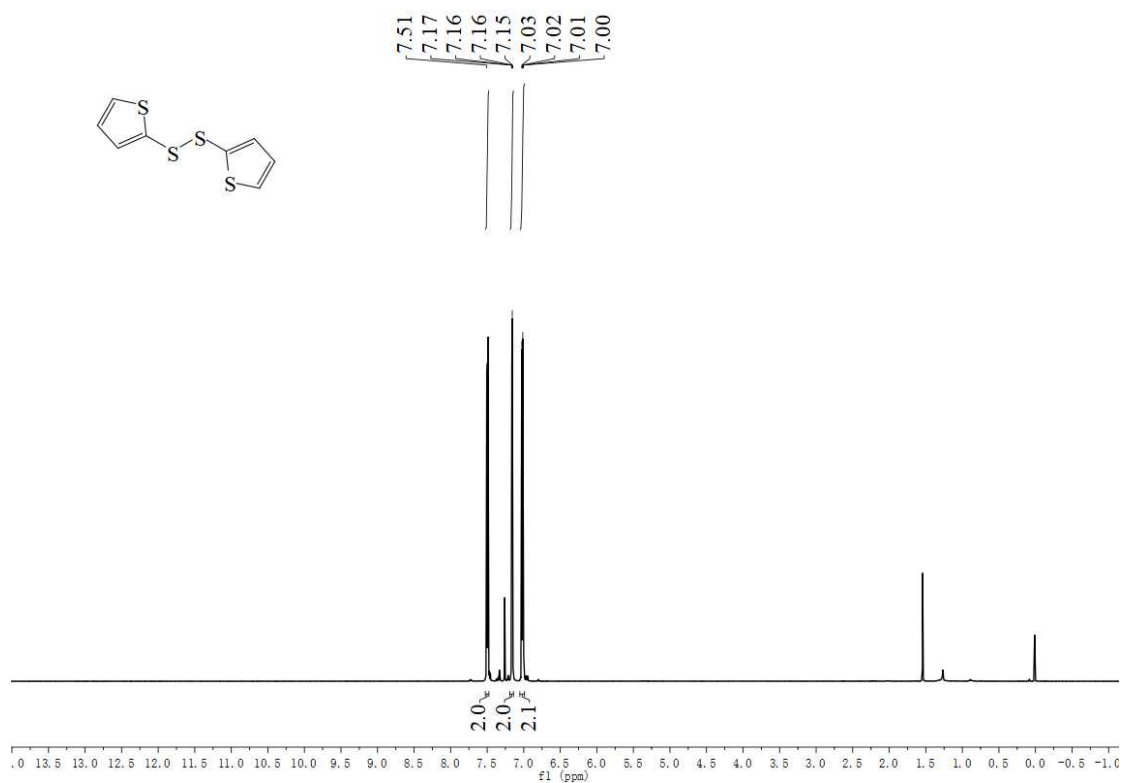

<sup>1</sup>H NMR (CDCl<sub>3</sub>, 400 MHz) of **2r**

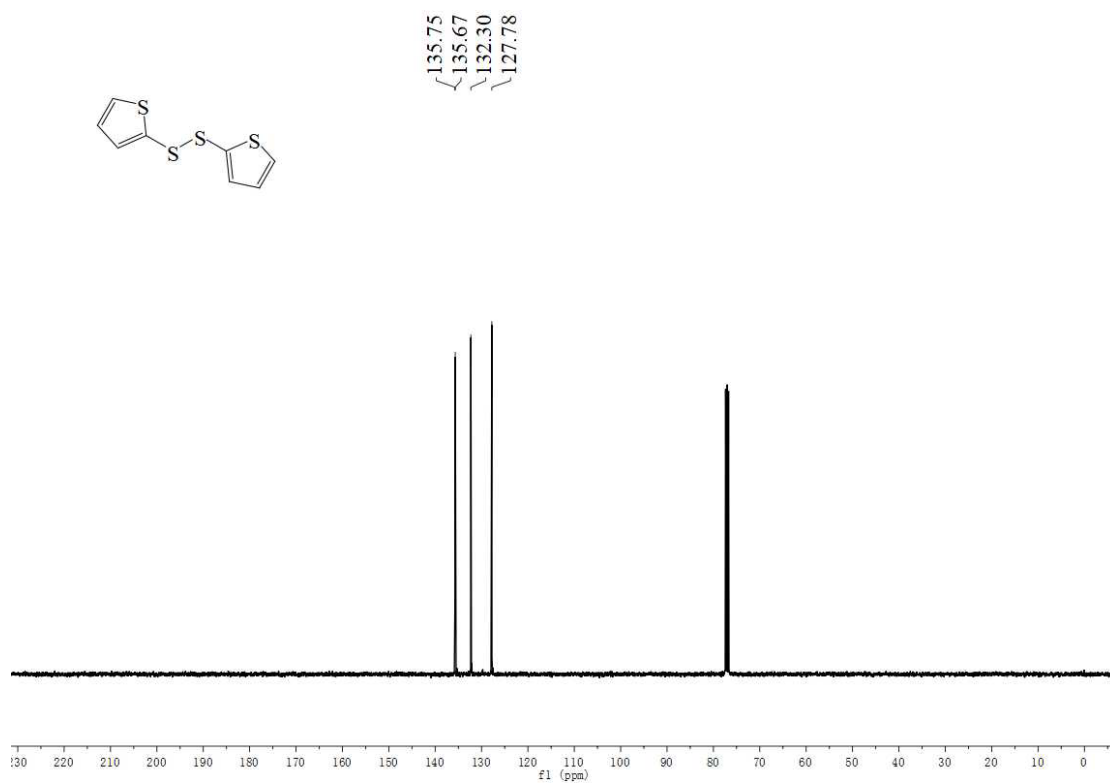

<sup>13</sup>C NMR (CDCl<sub>3</sub>, 100 MHz) of **2r**



**1,2-di(pyridin-4-yl)disulfane (2s)**

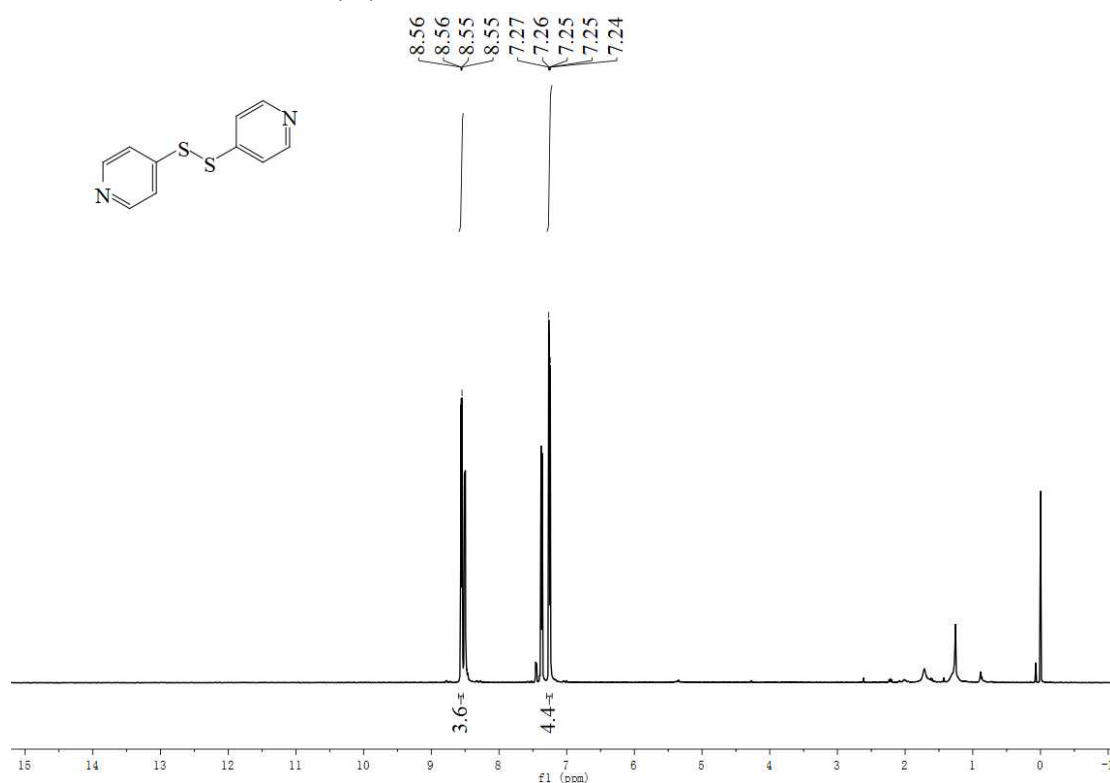

<sup>1</sup>H NMR (CDCl<sub>3</sub>, 400 MHz) of **2s**

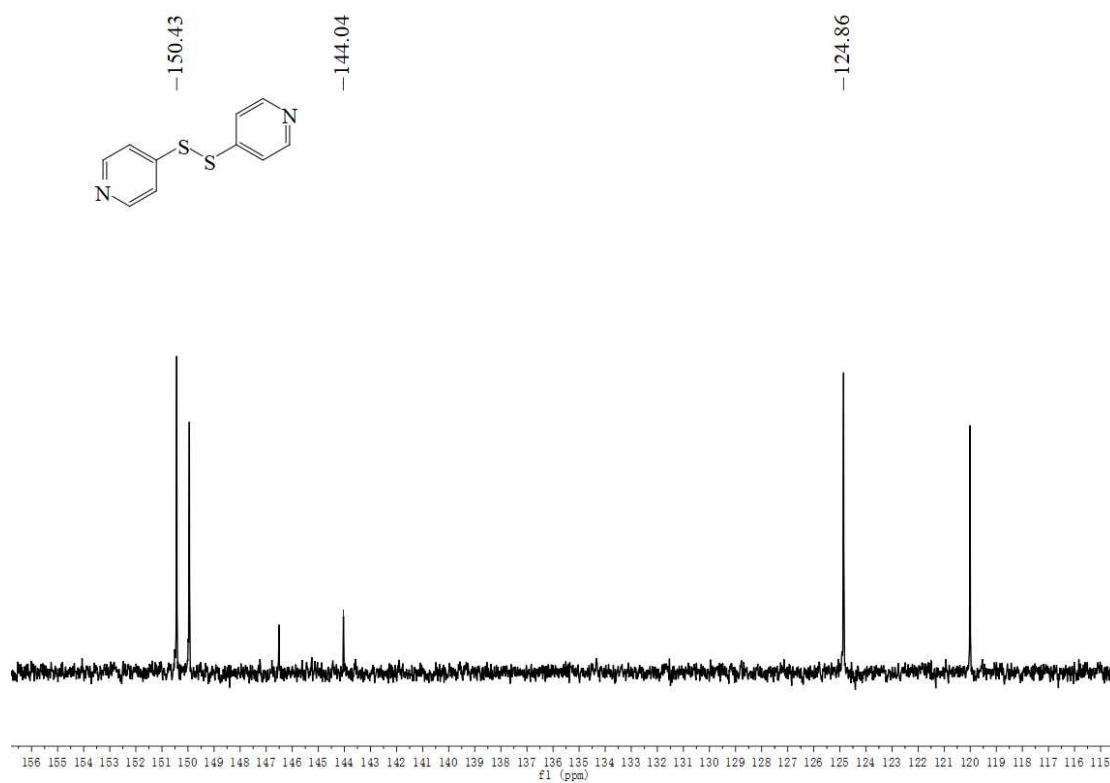

<sup>13</sup>C NMR (CDCl<sub>3</sub>, 400 MHz) of **2s**

*di(pyridine-4-yl)sulfane (2s')*

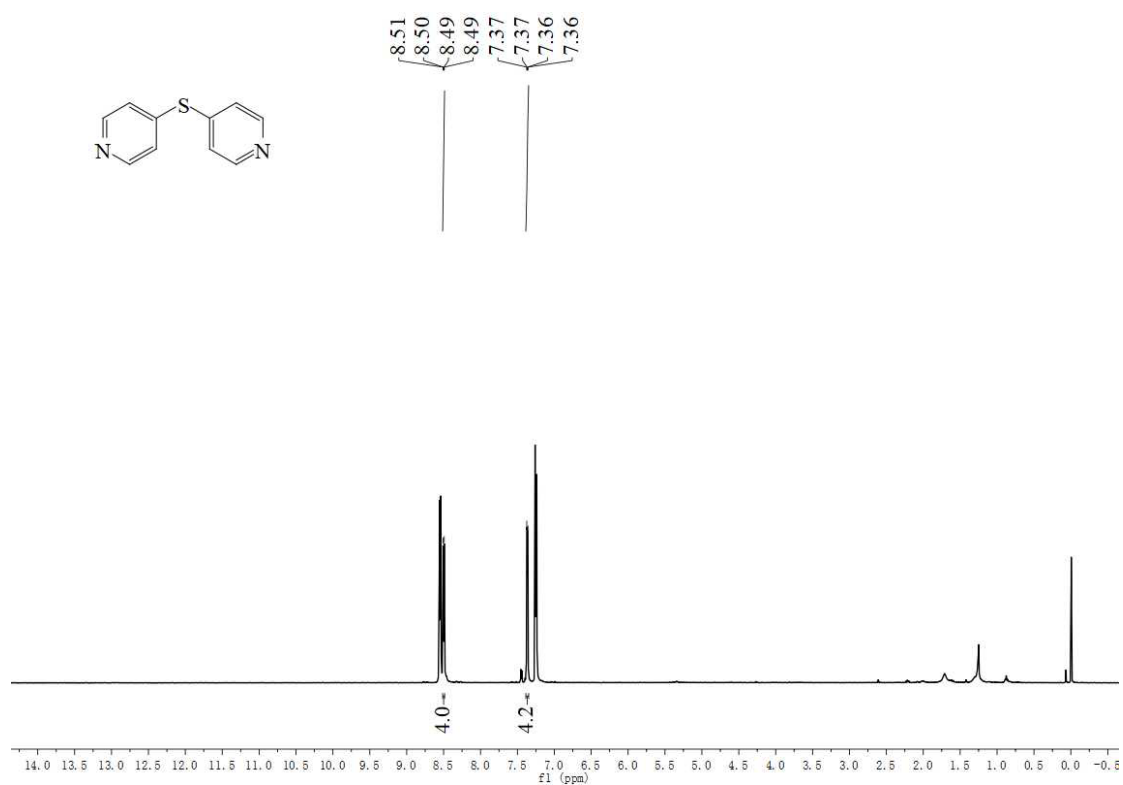

<sup>1</sup>H NMR (CDCl<sub>3</sub>, 400 MHz) of **2s'**

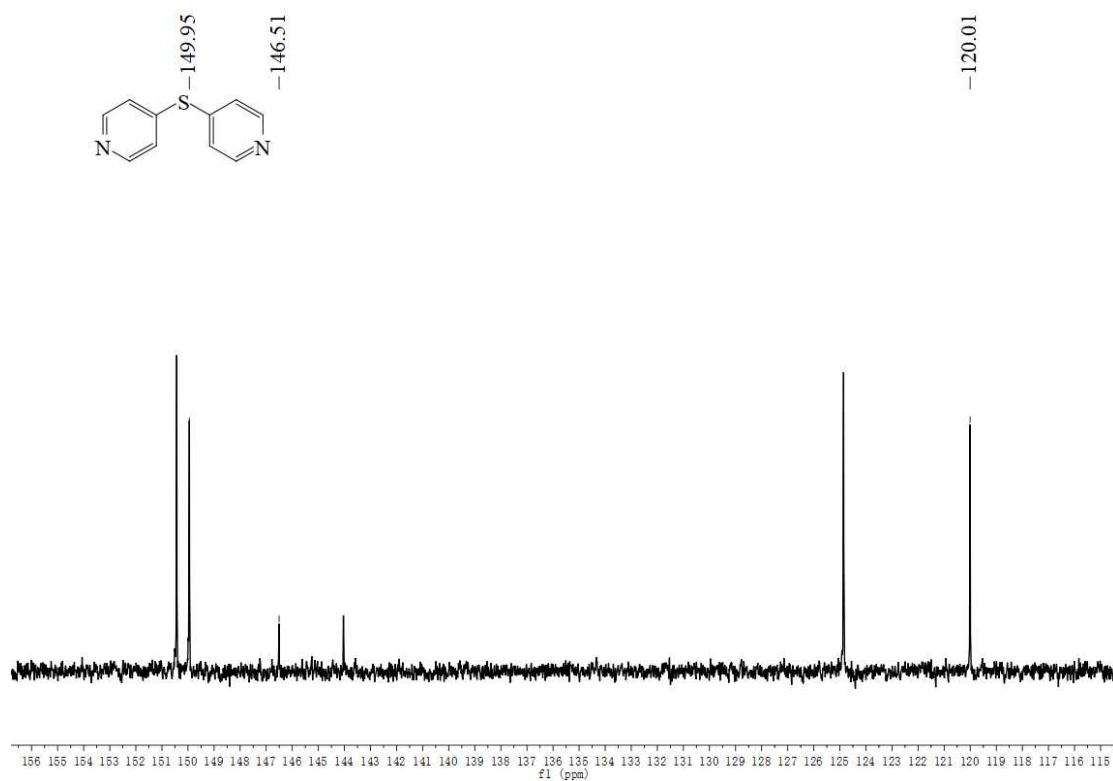

<sup>13</sup>C NMR (CDCl<sub>3</sub>, 100 MHz) of **2s'**

**1,2-dibenzylidysulfane (2t)**

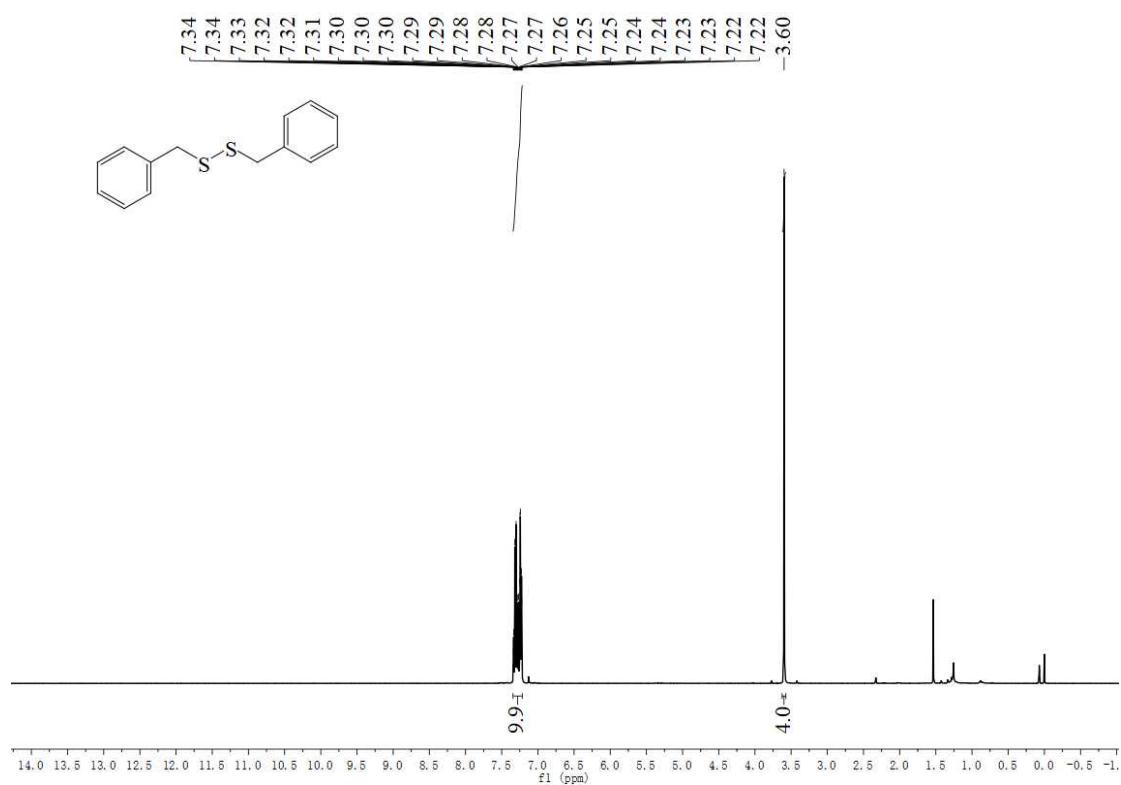

**<sup>1</sup>H NMR (CDCl<sub>3</sub>, 400 MHz) of 2t**

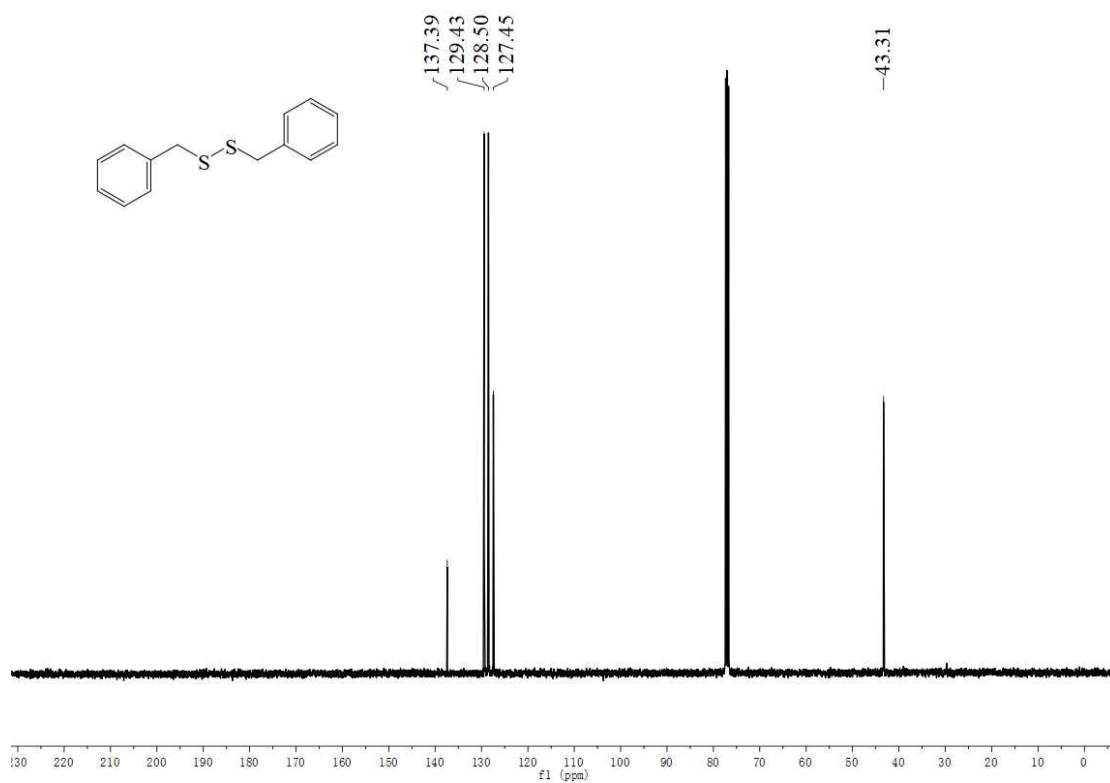

**<sup>13</sup>C NMR (CDCl<sub>3</sub>, 100 MHz) of 2t**

**1,2-bis(4-methylbenzyl)disulfane (2u)**

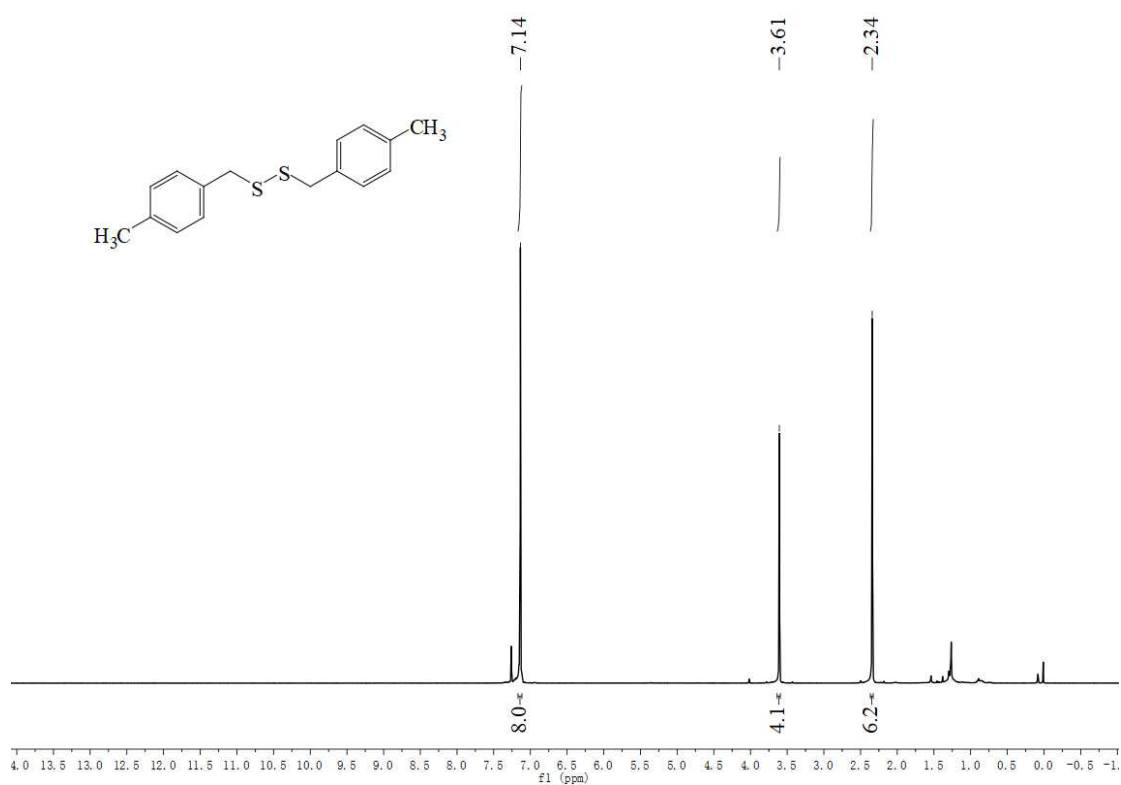

**<sup>1</sup>H NMR (CDCl<sub>3</sub>, 400 MHz) of 2u**

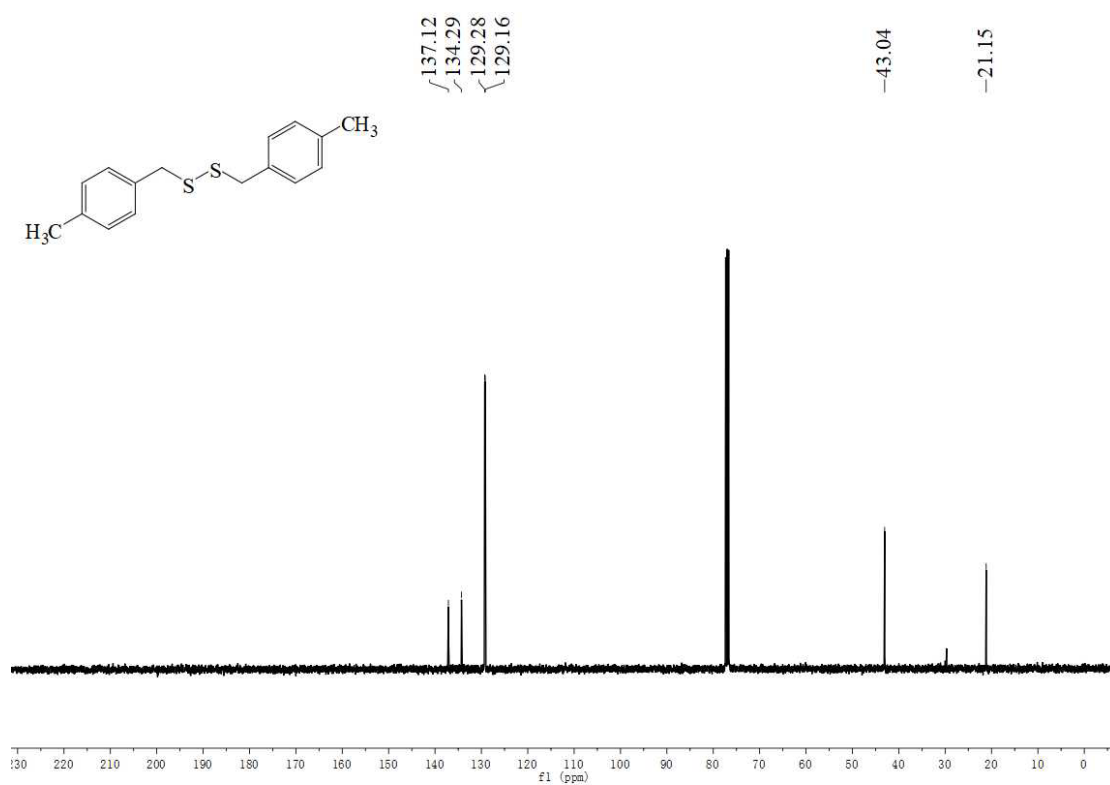

**<sup>13</sup>C NMR (CDCl<sub>3</sub>, 100 MHz) of 2u**

**Bis(4-chlorobenzyl)disulfide (2v)**

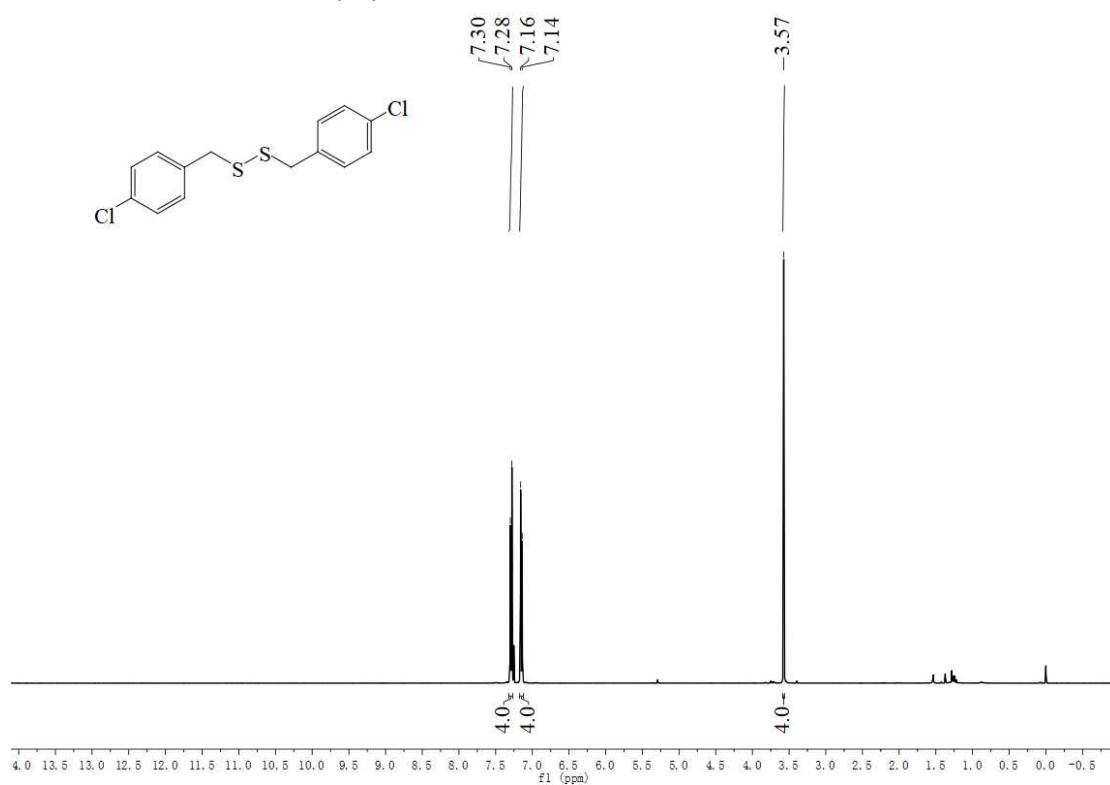

<sup>1</sup>H NMR (CDCl<sub>3</sub>, 400 MHz) of **2v**

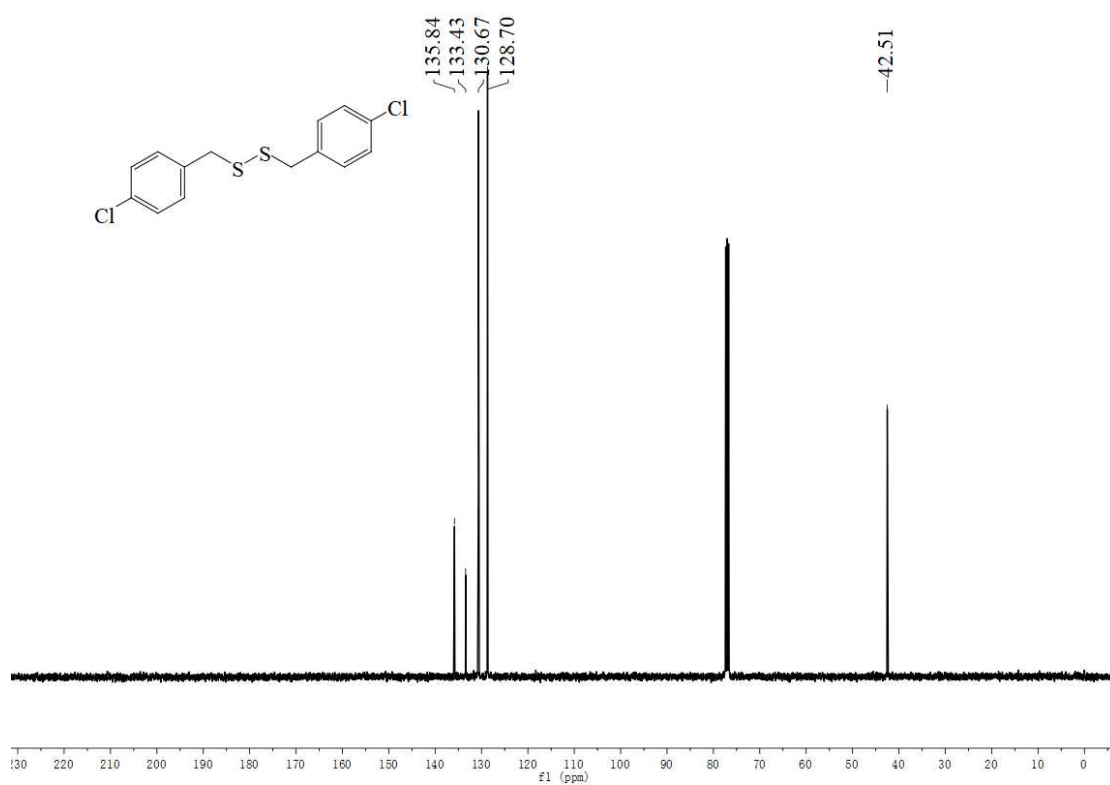

<sup>13</sup>C NMR (CDCl<sub>3</sub>, 100 MHz) of **2v**

**1,2-dipropyldisulfane (2w)**

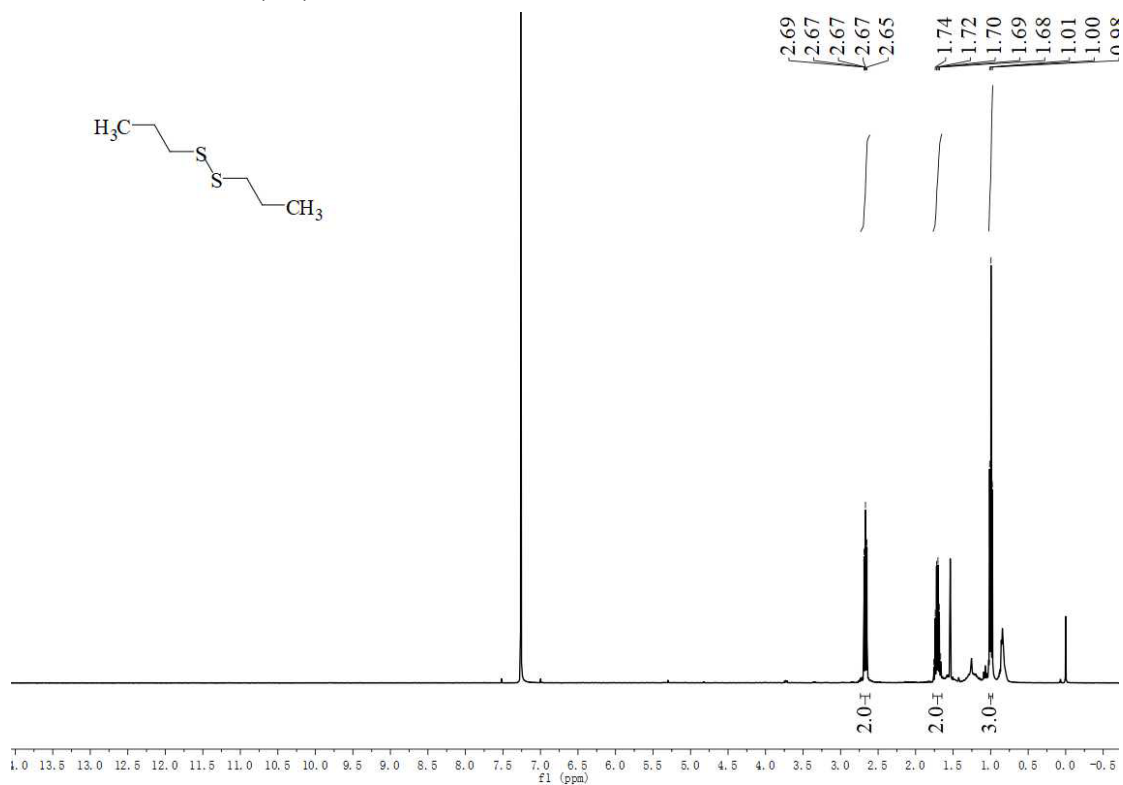

<sup>1</sup>H NMR (CDCl<sub>3</sub>, 400 MHz) of **2w**

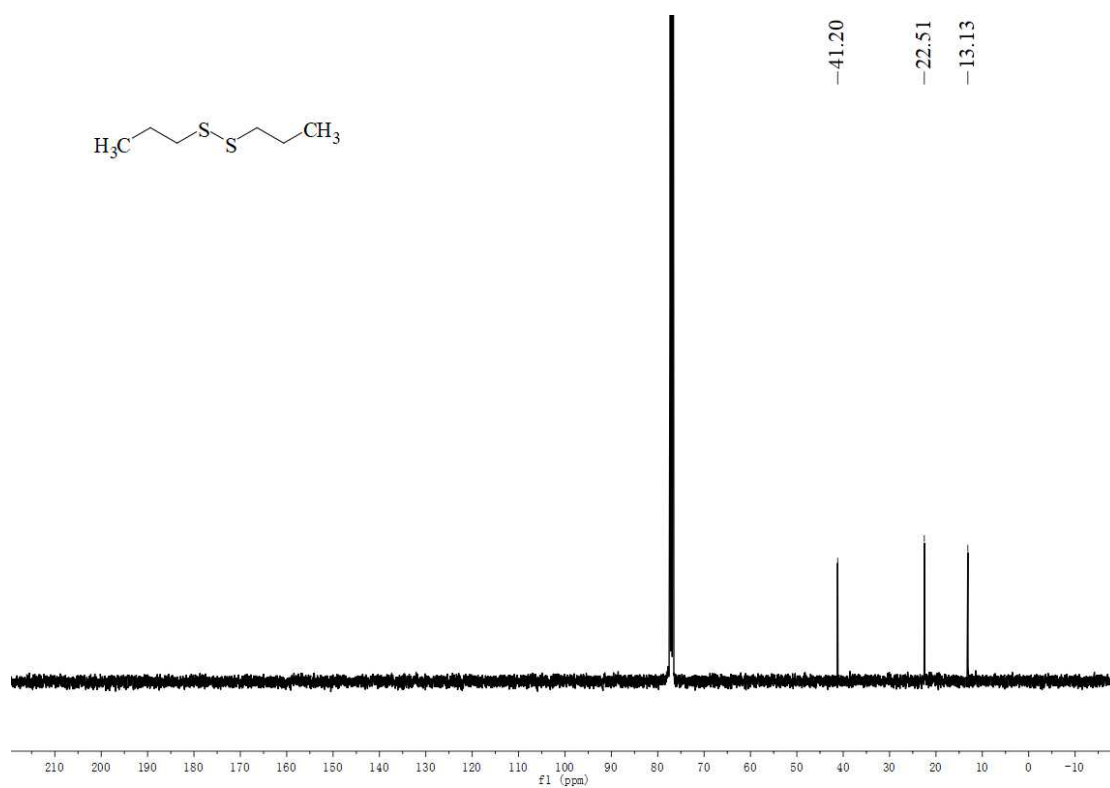

<sup>13</sup>C NMR (CDCl<sub>3</sub>, 100 MHz) of **2w**

**1,2-dibutylidisulfane (2x)**

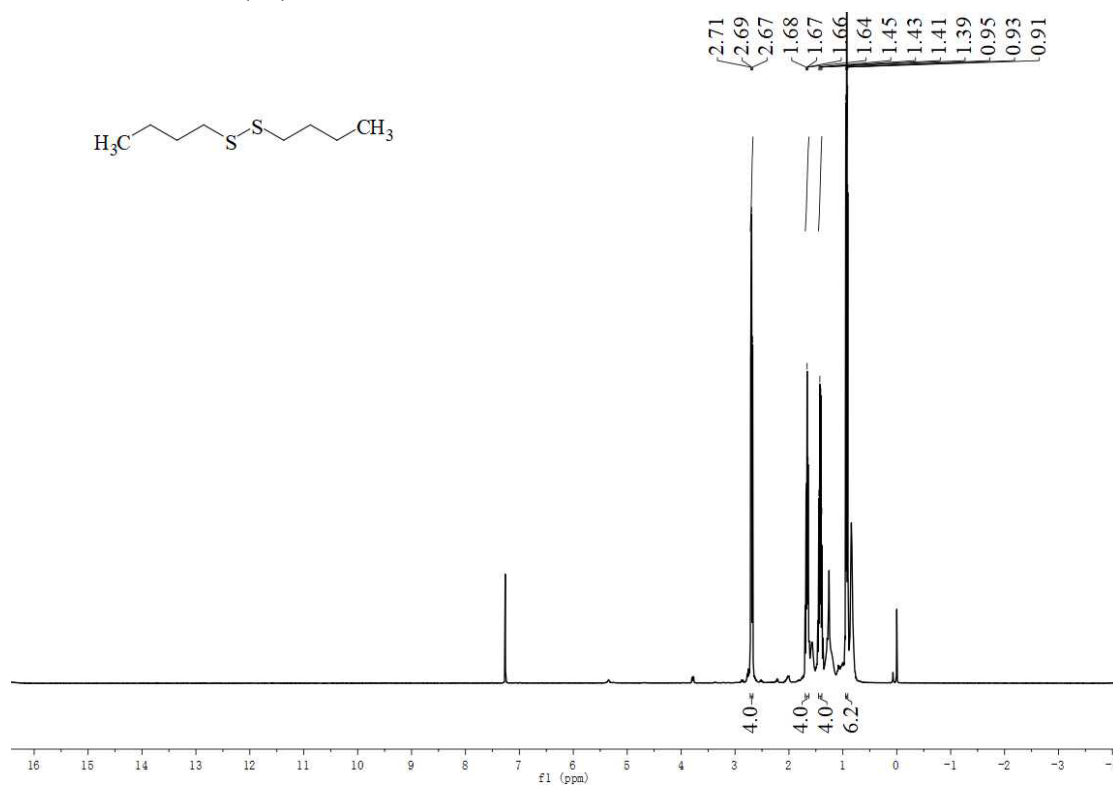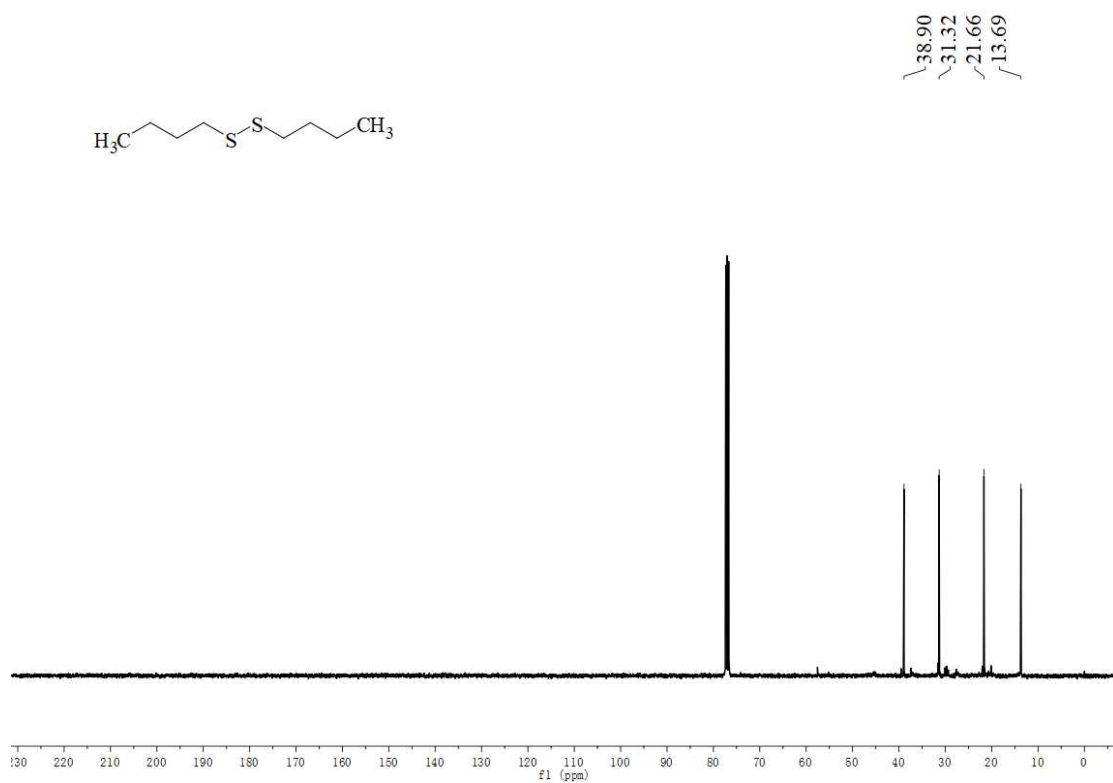

**1,2-dihexyldisulfane (2y)**

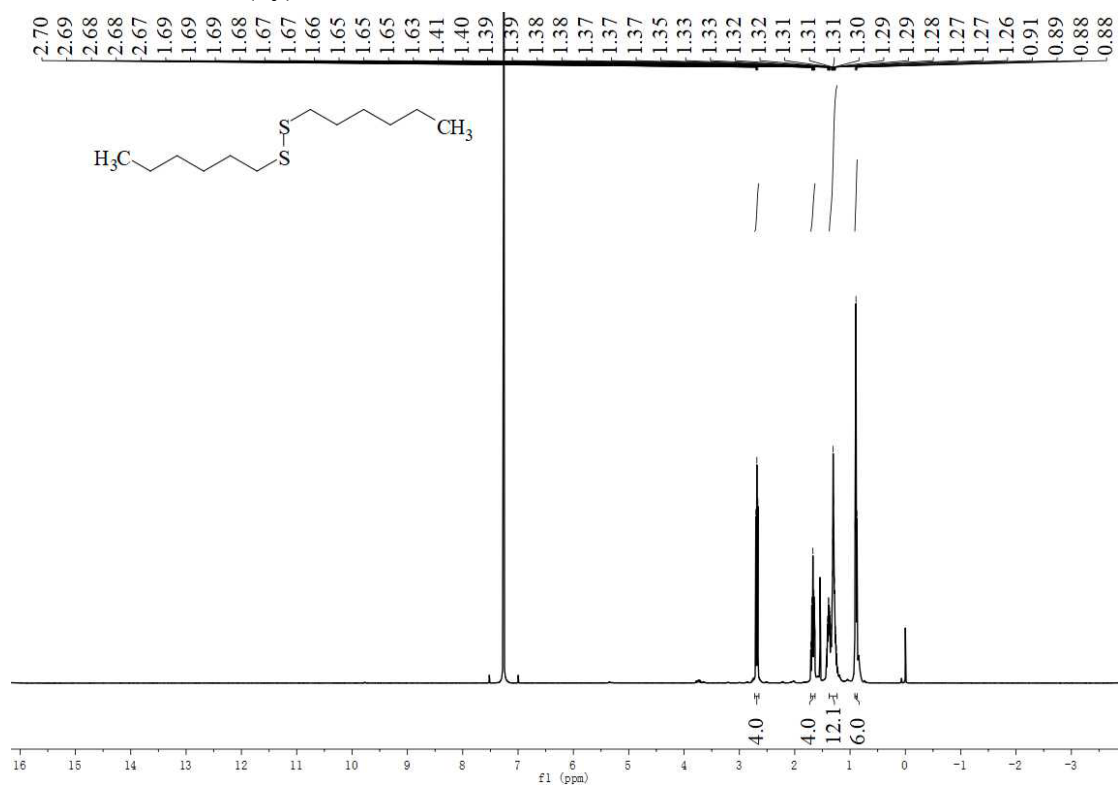

$^1\text{H NMR}$  (CDCl<sub>3</sub>, 400 MHz) of **2y**

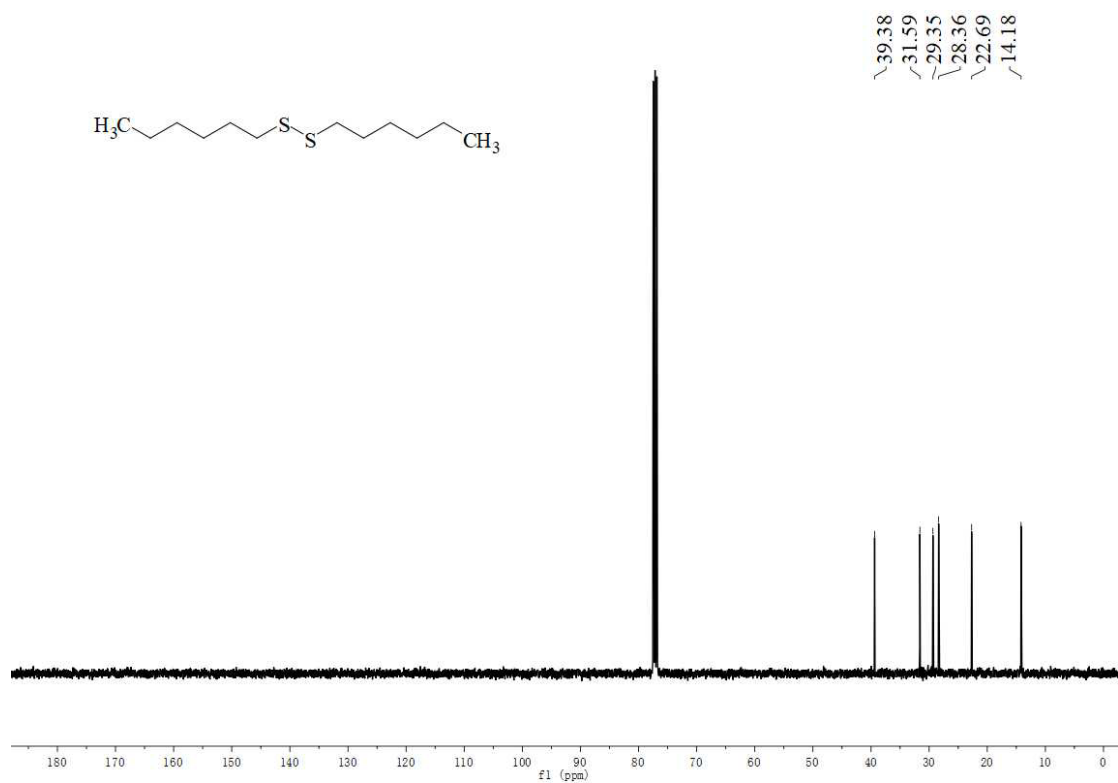

$^{13}\text{C NMR}$  (CDCl<sub>3</sub>, 100 MHz) of **2y**



**1,2-diisobutyldisulfane (2z)**

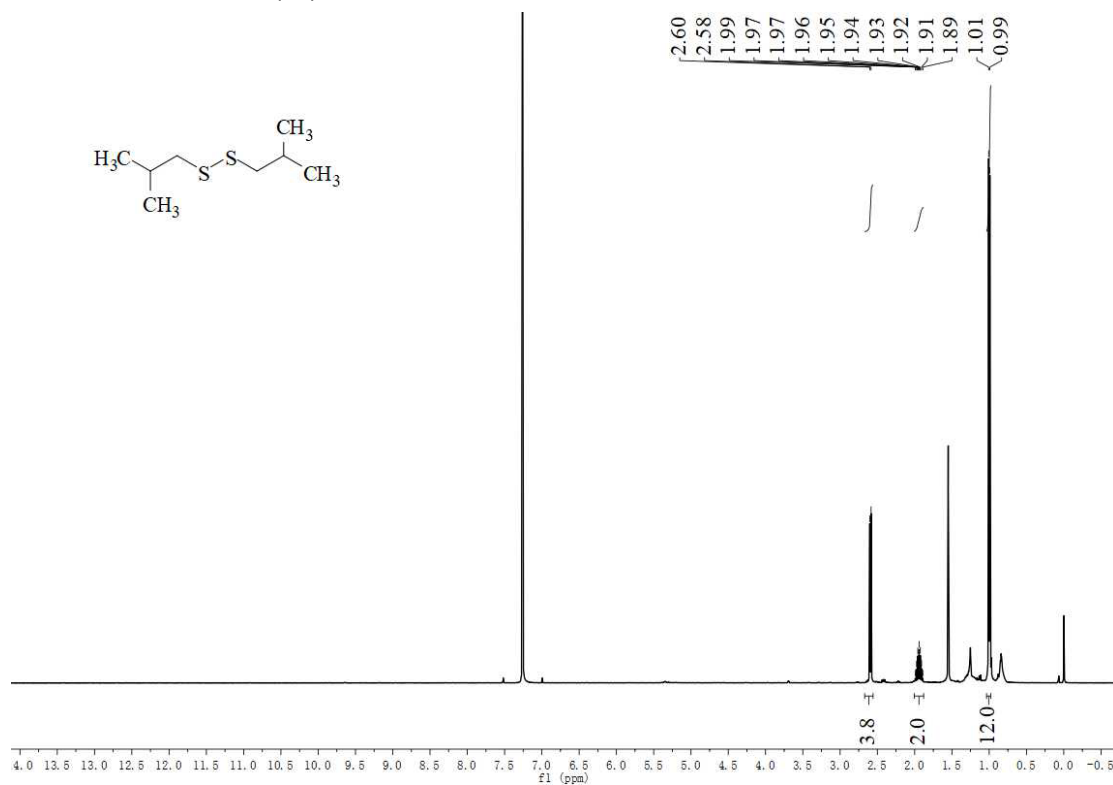

<sup>1</sup>H NMR (CDCl<sub>3</sub>, 400 MHz) of **2z**

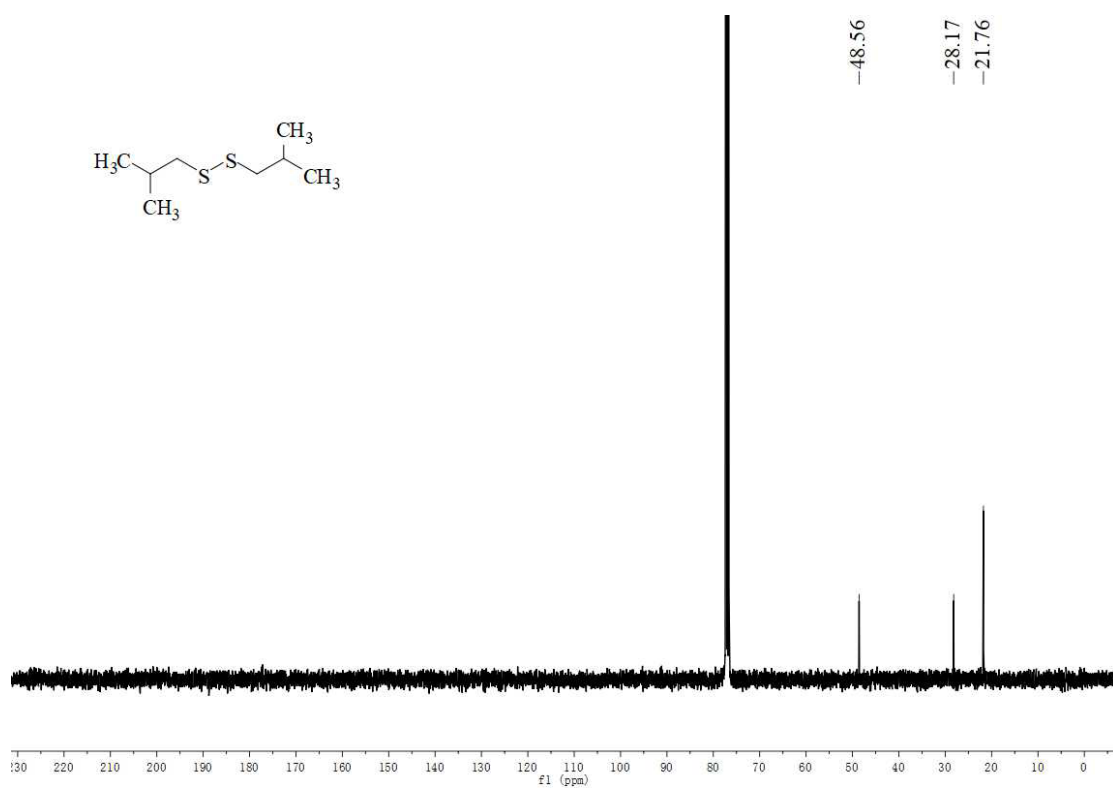

<sup>13</sup>C NMR (CDCl<sub>3</sub>, 100 MHz) of **2z**
